# Supplementary material for: The Stricter the Better? The Relationship between Targeted HbA1cValues and Metabolic Control of Pediatric Type 1 Diabetes Mellitus
Source: Hindawi journal article supplement (doi:10.1155/2016/5490258), 2016-01-01
Supplement: f1 [file 5490258.f1.pdf]

## Supplementary material 1. Study protocol.

|                                                                                                                                                                                                                                                                                                                                                                                                                                                                                                                                                                                                                                      |
|--------------------------------------------------------------------------------------------------------------------------------------------------------------------------------------------------------------------------------------------------------------------------------------------------------------------------------------------------------------------------------------------------------------------------------------------------------------------------------------------------------------------------------------------------------------------------------------------------------------------------------------|
| <b>INTRODUCTION</b>                                                                                                                                                                                                                                                                                                                                                                                                                                                                                                                                                                                                                  |
| <b>Nature and context of the problem:</b>                                                                                                                                                                                                                                                                                                                                                                                                                                                                                                                                                                                            |
| There are large discrepancies between diabetic associations worldwide in defining targeted value of HbA <sub>1c</sub> . Taking into consideration the aforementioned fact and large differences in metabolic control of paediatric patients with type 1 diabetes mellitus, a question about the real impact of those guideline values on metabolic control still needs to be answered.                                                                                                                                                                                                                                               |
| <b>Aim of review:</b>                                                                                                                                                                                                                                                                                                                                                                                                                                                                                                                                                                                                                |
| To compare achieved HbA <sub>1c</sub> concentrations with targeted guideline values in paediatric patients with DM1 worldwide.                                                                                                                                                                                                                                                                                                                                                                                                                                                                                                       |
| <b>Rationale:</b>                                                                                                                                                                                                                                                                                                                                                                                                                                                                                                                                                                                                                    |
| Measurement of HbA <sub>1c</sub> concentration is a valid clinical test for metabolic control of patients with diabetes mellitus. The guideline values for HbA <sub>1c</sub> differ among countries, especially when paediatric population is taken into consideration. There is hardly evidence that could assess which guidelines are the most appropriate to accurately control this disease among patients under 18 yrs.. Therefore we aim in this review to compare the HbA <sub>1c</sub> values after 1 yr. after diagnosis and appropriate treatment with relation to guideline values between different countries worldwide. |
| <b>RESEARCH QUESTION</b>                                                                                                                                                                                                                                                                                                                                                                                                                                                                                                                                                                                                             |
| <b>Population</b>                                                                                                                                                                                                                                                                                                                                                                                                                                                                                                                                                                                                                    |
| Paediatric population (<18 yrs.) with diagnosed T1DM and treated with insulin (Multiple Daily Injections, Continuous Subcutaneous Insulin Infusion) for more than 1 yr.                                                                                                                                                                                                                                                                                                                                                                                                                                                              |
| <b>Reference standard</b>                                                                                                                                                                                                                                                                                                                                                                                                                                                                                                                                                                                                            |
| Guideline values that were applied at the moment when the study was on-going.                                                                                                                                                                                                                                                                                                                                                                                                                                                                                                                                                        |
| <b>Outcomes</b>                                                                                                                                                                                                                                                                                                                                                                                                                                                                                                                                                                                                                      |
| HbA <sub>1c</sub> concentration (mean±SD) among participants at the beginning of each study; difference (delta (Δ)) of [HbA <sub>1c</sub> ] values between guideline and actual HbA <sub>1c</sub> value in each study; subgroups in studies with HbA <sub>1c</sub> values below 10%; regarding gross-domestic product (GDP) and prevalence of acute diabetic complications                                                                                                                                                                                                                                                           |
| <b>Study designs included in our review</b>                                                                                                                                                                                                                                                                                                                                                                                                                                                                                                                                                                                          |
| Registries, interventional trials, cross-sectional trials will be included in the review as well as case series with start date in 2008 and number of participants more than 50, because such case series with lower number of patients often include preferred groups, e.g. only good metabolic control patients                                                                                                                                                                                                                                                                                                                    |
| <b>SEARCH PLAN</b>                                                                                                                                                                                                                                                                                                                                                                                                                                                                                                                                                                                                                   |
| <b>Scoping searches</b>                                                                                                                                                                                                                                                                                                                                                                                                                                                                                                                                                                                                              |

Scoping searches\*, to identify systematic reviews and health technology assessments on this topic will be undertaken in the following:

**Cochrane Database of Systematic Reviews (CDSR)**

<http://www.library.nhs.uk/default.aspx>

**Database of Reviews of Effects (DARE)**

<http://www.crd.york.ac.uk/crdweb/>

**Health Technology Assessment Database (HTA)**

<http://www.crd.york.ac.uk/crdweb/>

**Agency for Health Technology Assessment in Poland (AHTAPol)** <http://www.aotm.gov.pl>

\*based on the ARIF protocol - <http://www.arif.bham.ac.uk/strategy.shtml> [accessed 7-2-11]

#### Main review searches

The main aim of the search will be to systematically identify studies. The following data sources will be searched:

- Bibliographic databases including Cochrane Library (CENTRAL), MEDLINE, EMBASE
- Citation lists of relevant studies
- Contact with experts in the field
- Conference proceedings – any specific paediatric conferences ? Treatment algorithms; Guidelines
- Previous trials unit protocols.

Up to the moment guideline values will be obtained from official websites of national associations for diabetes in each of selected countries.

No language restrictions will be applied. We will take into consideration studies no older than five years. If we find a systematic review and it is reliable one (after critical appraisal) then we will narrow our search date to update the evidence we have.

#### Example of search strategy

Database: Embase <1996 to 2013 Week 34>

Search Strategy:

----- 1  
paediatric.mp. or pediatrics/ (72936)  
2 limit 1 to yr="2008 -Current" (39429)  
3 pediatric.mp. or pediatrics/ (210372)  
4 limit 3 to yr="2008 -Current" (116292)  
5 2 or 4 (135620)  
6 diabetes.mp. or diabetes mellitus/ (463736)  
7 limit 6 to yr="2008 -Current" (259967)  
8 insulin.mp. or insulin treatment/ or insulin dependent diabetes mellitus/ or insulin/  
(360982)  
9 limit 8 to yr="2008 -Current" (185073)  
10 insulin therapy.mp. or insulin treatment/ (16700)  
11 limit 10 to yr="2008 -Current" (8835)  
12 9 or 11 (185073)  
13 haemoglobin.mp. or hemoglobin/ (79530)  
14 limit 13 to yr="2008 -Current" (46243)  
15 glycosylated hemoglobin/ or hemoglobin A1c/ or hemoglobin A/ or hemoglobin analysis/  
or hemoglobin blood level/ or hemoglobin.mp. or hemoglobin/ (147579)  
16 limit 15 to yr="2008 -Current" (86235)  
17 HbA1c.mp. or hemoglobin A1c/ (42210)  
18 limit 17 to yr="2008 -Current" (28330)  
19 14 or 16 or 18 (88821)  
20 5 and 7 and 12 and 19 (759)

\*\*\*\*\*

#### **Making inclusion/exclusion decisions.**

Three reviewers will independently assess papers for inclusion/exclusion criteria using the title and articles' abstract. Disagreements will be resolved by discussion. Full paper copies of relevant or potentially relevant references will be obtained for detailed examination. Foreign language publications will be screened using English abstracts. Translations will be obtained where necessary or were possible, within the resources and timeframe of the project.

#### **DATA HANDLING**

##### **Data extraction strategy**

Data will be extracted using a pre-designed data extraction form, by one reviewer and checked by a two other reviewers. Where information is missing authors will be contacted, but within the resources and timeframe of the project. Data from studies with multiple publications will be extracted and reported as a single study, in case of discrepancies the publication with biggest representative population will be utilized.

##### **Methods of analysis**

A descriptive analysis of included studies will be undertaken and relevant evidence will be categorised and summarised in tables (excel and word). GLM model for regression analysis will be used since no intervention is assessed. When appropriate, weighted variable will be used e.g. GPD per capita, number of patients included into the study.

Identified research evidence will be appropriately interpreted according to the assessment of methodological strengths and weaknesses and the possibility of potential biases.

The following subgroup analyses will be undertaken:

- High-income countries' HbA<sub>1c</sub> median values.
- Median value of HbA<sub>1c</sub> with exclusion of measurements higher than 10%

#### **Data extraction**

Standard data extraction table designed for this study will be used.

General study characteristics: Abstract/Full-text article, Critical evaluation, Type of Study  
Population: Country, GPD per capita, Number of patients included into the study, Age, T1DM duration

Control: Guideline HbA<sub>1c</sub> targeted values

Outcomes: Primary; secondary; HbA<sub>1c</sub> value, ΔHbA<sub>1c</sub>

#### **TIMELINES**

#### **Meeting and Project Schedule**

1<sup>st</sup> quarter of August 2013 – Presentation of the protocol and preliminary searches (scoping searches); allocation of work

Up to 26<sup>th</sup> August 2013 – Systematic search and screening by title and abstract:

September 2013 – Obtaining full-text papers

Till the end of May 2014 – assessment of eligibility (PIROS)

June – September 2014 – Data extraction [HbA<sub>1c</sub>]

1<sup>st</sup> quarter of October 2014 – Search for guideline values

Till the end of November 2014 – e-mail contact with authors for data complementation

December 2014 – Data analysis

January 2015 – Conclusions and drafting the full-text article

End of January 2015 – Full-text article (supplementary data) submission.

## Supplementary material 2. Search strategy examples.

Database: Embase <1996 to 2013 Week 34> Search Strategy:

-----

- 1 paediatric.mp. or pediatrics/ (72936) 2
- limit 1 to yr="2008 -Current" (39429) 3
- pediatric.mp. or pediatrics/ (210372)
- 4 limit 3 to yr="2008 -Current" (116292)
- 5 2 or 4 (135620)
- 6 diabetes.mp. or diabetes mellitus/ (463736)
- 7 limit 6 to yr="2008 -Current" (259967)
- 8 insulin.mp. or insulin treatment/ or insulin dependent diabetes mellitus/ or insulin/ (360982)
- 9 limit 8 to yr="2008 -Current" (185073)
- 10 insulin therapy.mp. or insulin treatment/ (16700)
- 11 limit 10 to yr="2008 -Current" (8835)
- 12 9 or 11 (185073)
- 13 haemoglobin.mp. or hemoglobin/ (79530)
- 14 limit 13 to yr="2008 -Current" (46243)
- 15 glycosylated hemoglobin/ or hemoglobin A1c/ or hemoglobin A/ or hemoglobin analysis/ or hemoglobin blood level/ or hemoglobin.mp. or hemoglobin/ (147579)
- 16 limit 15 to yr="2008 -Current" (86235)
- 17 HbA1c.mp. or hemoglobin A1c/ (42210)
- 18 limit 17 to yr="2008 -Current" (28330)
- 19 14 or 16 or 18 (88821)
- 20 5 and 7 and 12 and 19 (759)

\*\*\*\*\*

Database: Ovid MEDLINE(R) <1946 to  
August Week 2 2013> Search Strategy:

-----

- 1 Infant, Newborn/ or Infant/ or Child/ or Pediatrics/ or paediatric.mp. or Child, Preschool/ or Adolescent/ (2870946)
- 2 limit 1 to yr="2008 -Current" (580408)
- 3 pediatric.mp. or Pediatrics/ (187262)
- 4 limit 3 to yr="2008 -Current" (59566)
- 5 2 or 4 (586699)
- 6 Diabetes Mellitus, Type 1/ or diabetes.mp. (389842)
- 7 limit 6 to yr="2008 -Current" (125463)
- 8 Insulin/ or insulin therapy.mp. (161735)
- 9 limit 8 to yr="2008 -Current" (31546)
- 10 Hemoglobin A, Glycosylated/ or haemoglobin.mp. (45341)

11 limit 10 to yr="2008 -Current" (14104)  
12 Hemoglobin A, Glycosylated/ or glycated.mp. (26259)  
13 limit 12 to yr="2008 -Current" (10818)  
14 11 or 13 (15239)  
15 Hemoglobin A, Glycosylated/ or HbA1c.mp. or Hemoglobin A/ (30984)  
16 limit 15 to yr="2008 -Current" (11949)  
17 14 or 16 (17494)  
18 5 and 7 and 9 and 17 (606)

\*\*\*\*\*

### Supplementary material 3. HbA<sub>1c</sub> comparisons within subgroups:

#### 1. Comparison of actual HbA<sub>1c</sub> regarding targeted HbA<sub>1c</sub> level:

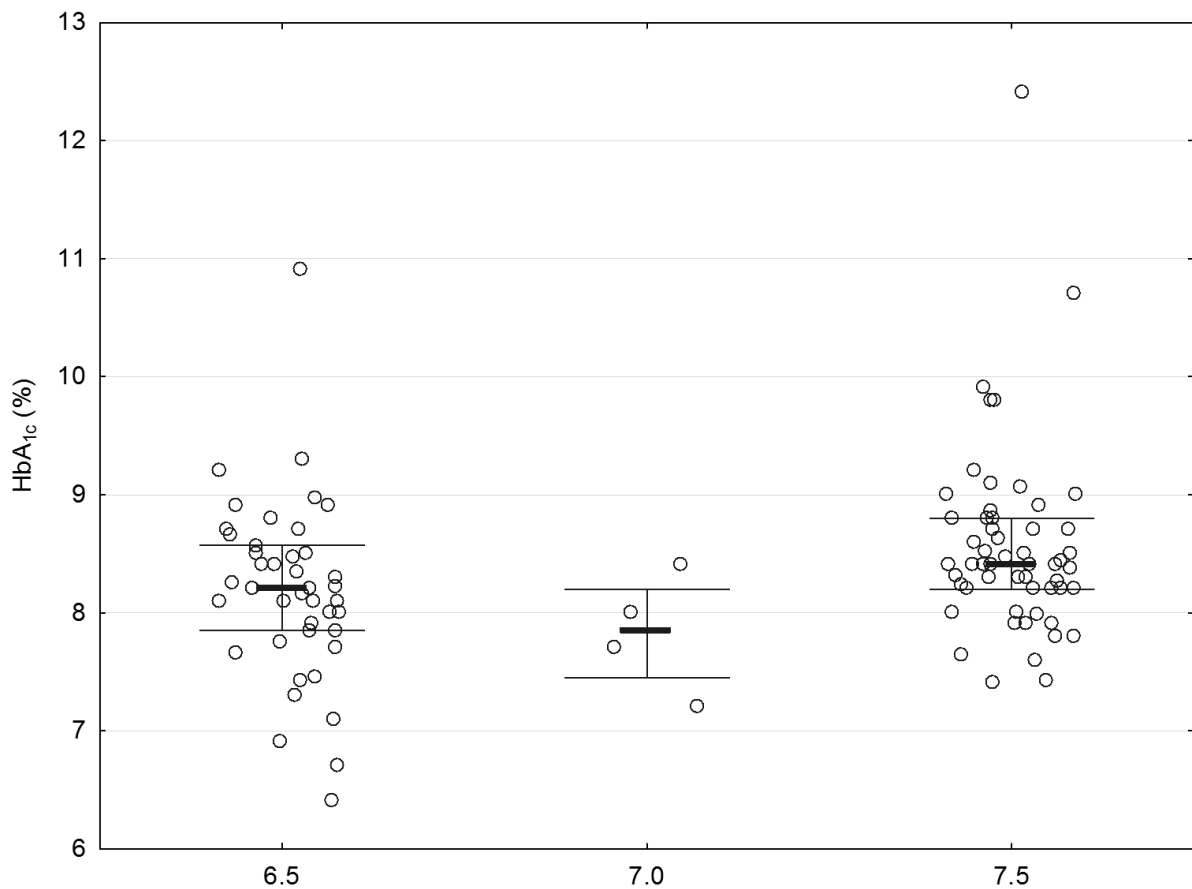

Figure 1 Comparison for actual HbA<sub>1c</sub> values between groups of 6.5% (47.53 mmol/mol), 7.0% (53 mmol/mol) and 7.5% (58.46 mmol/mol) as guideline values. (AKW p=0.0203)

Table 1 Comparison of actual HbA<sub>1c</sub> values regarding binding guideline levels. Values are given in % and mmol/mol in square brackets [mmol/mol]. (IQR – interquartile range, MWU – Mann-Whitney U-test, GLM – general linear model, AKW- KruskalWallis one-way analysis of variance)

| Subgroup of:          | Median (IQR) HbA <sub>1c</sub> in "6.5%"           | Median (IQR) HbA <sub>1c</sub> in "7.5%"           | p-value for comparison "6.5%" vs. "7.5%" (MWU; GLM with beta parameters) | Median (IQR) HbA <sub>1c</sub> in "7.0%"              | p-value for comparison "6.5%" vs. "7.5%" vs. "7.0%" (AKW) |
|-----------------------|----------------------------------------------------|----------------------------------------------------|--------------------------------------------------------------------------|-------------------------------------------------------|-----------------------------------------------------------|
| High-income countries | 8.20 (7.858.67)%;<br>[66.11 (62.2971.12) mmol/mol] | 8.40 (8.208.70)%;<br>[68.29 (66.1171.58) mmol/mol] | p=0.0935;<br>p=0.0245,<br>beta=-0.16                                     | 7.85 (7.7.458.20)%;<br>[62.29 (57.91-66.11) mmol/mol] | 0.0542                                                    |

|                                                   |                                                               |                                                             |                                      |                                                               |        |
|---------------------------------------------------|---------------------------------------------------------------|-------------------------------------------------------------|--------------------------------------|---------------------------------------------------------------|--------|
| Studies without<br>HbA <sub>1c</sub> values > 10% | 8.20<br>(7.858.50)%;<br>[66.11 (62.29-<br>69.39)<br>mmol/mol] | 8.40<br>(8.208.70)%;<br>[68.30<br>(66.1171.58)<br>mmol/mol] | p=0.0287;<br>p=0.0002,<br>beta=-0.24 | 7.85<br>(7.458.20)%;<br>[62.29 (57.91-<br>66.11)<br>mmol/mol] | 0.0227 |
|---------------------------------------------------|---------------------------------------------------------------|-------------------------------------------------------------|--------------------------------------|---------------------------------------------------------------|--------|

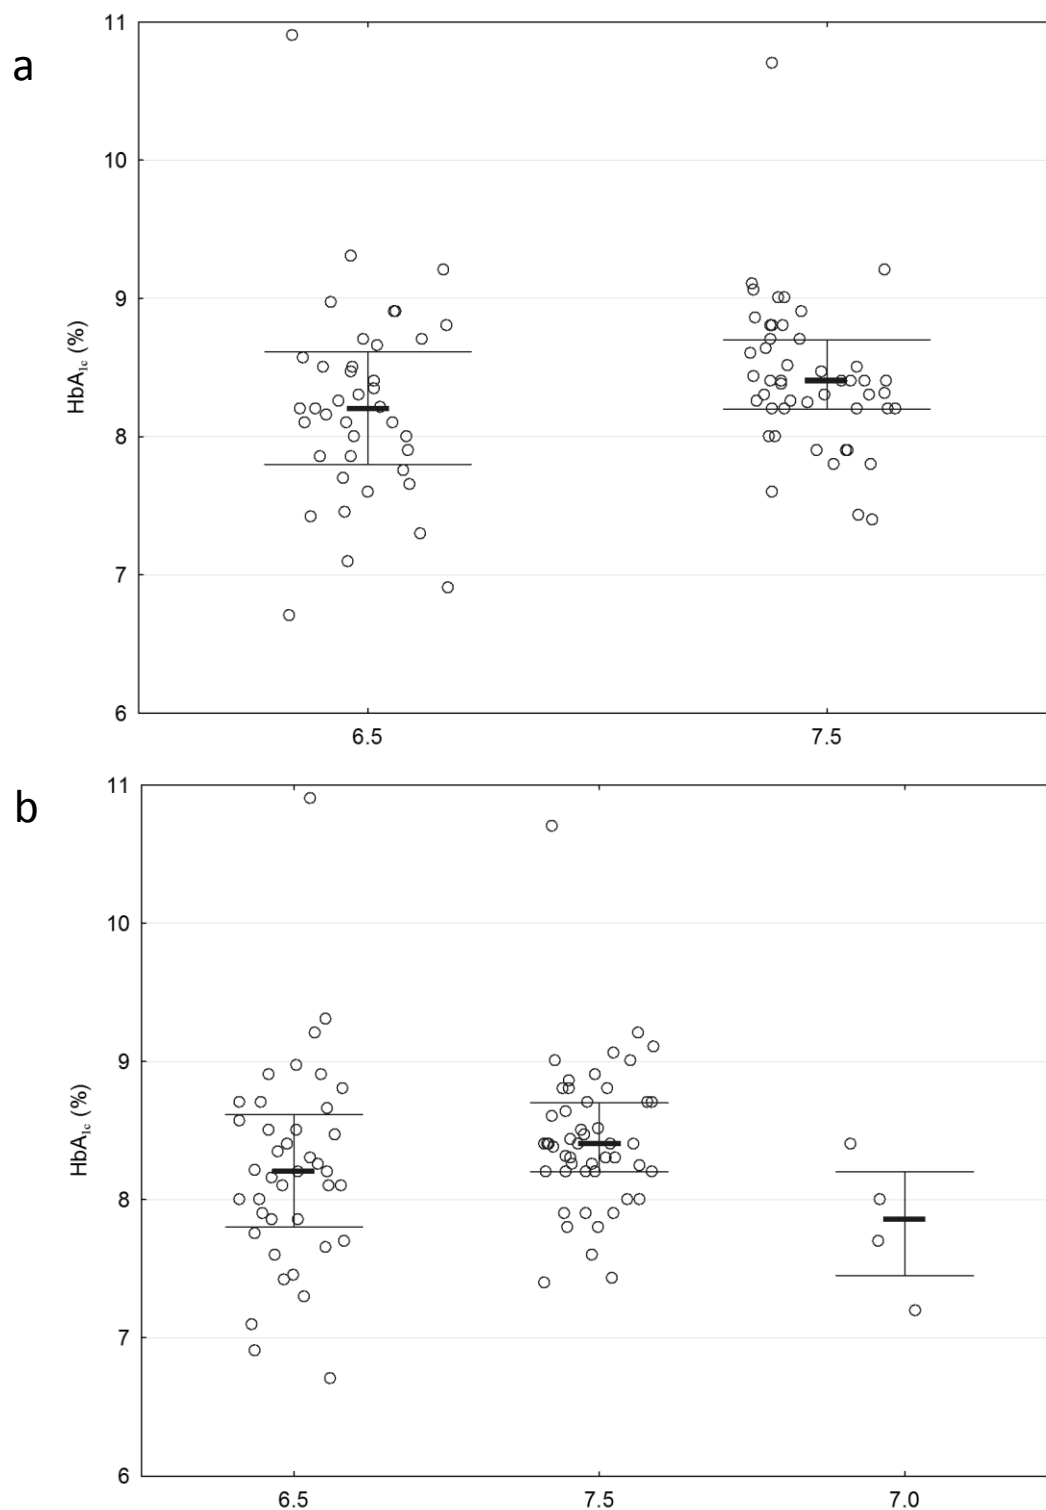

Figure 2 Comparison within high-income countries. "6.5" vs. "7.5" group (a) "6.5" vs. "7.0" vs. "7.5" (b)



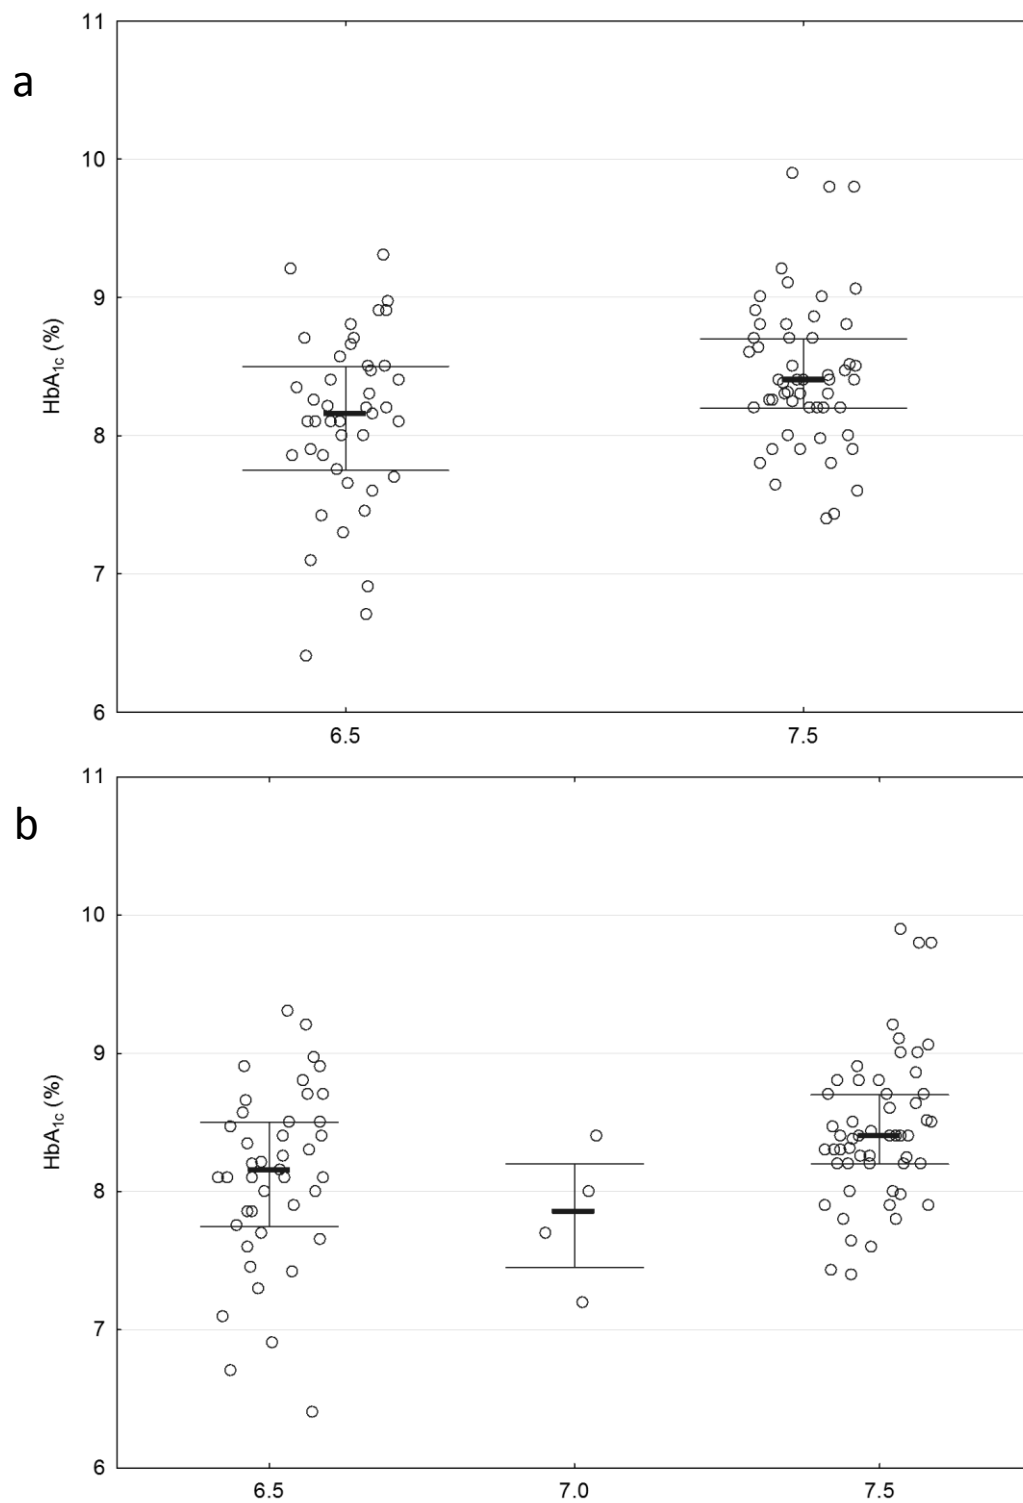

Figure 3 Comparison within studies without HbA<sub>1c</sub> values > 10%. "6.5" vs. "7.5" group **(a)** "6.5" vs. "7.0" vs. "7.5" **(b)**

## 2. Comparison of $\Delta$ HbA<sub>1c</sub> regarding targeted HbA<sub>1c</sub> level:

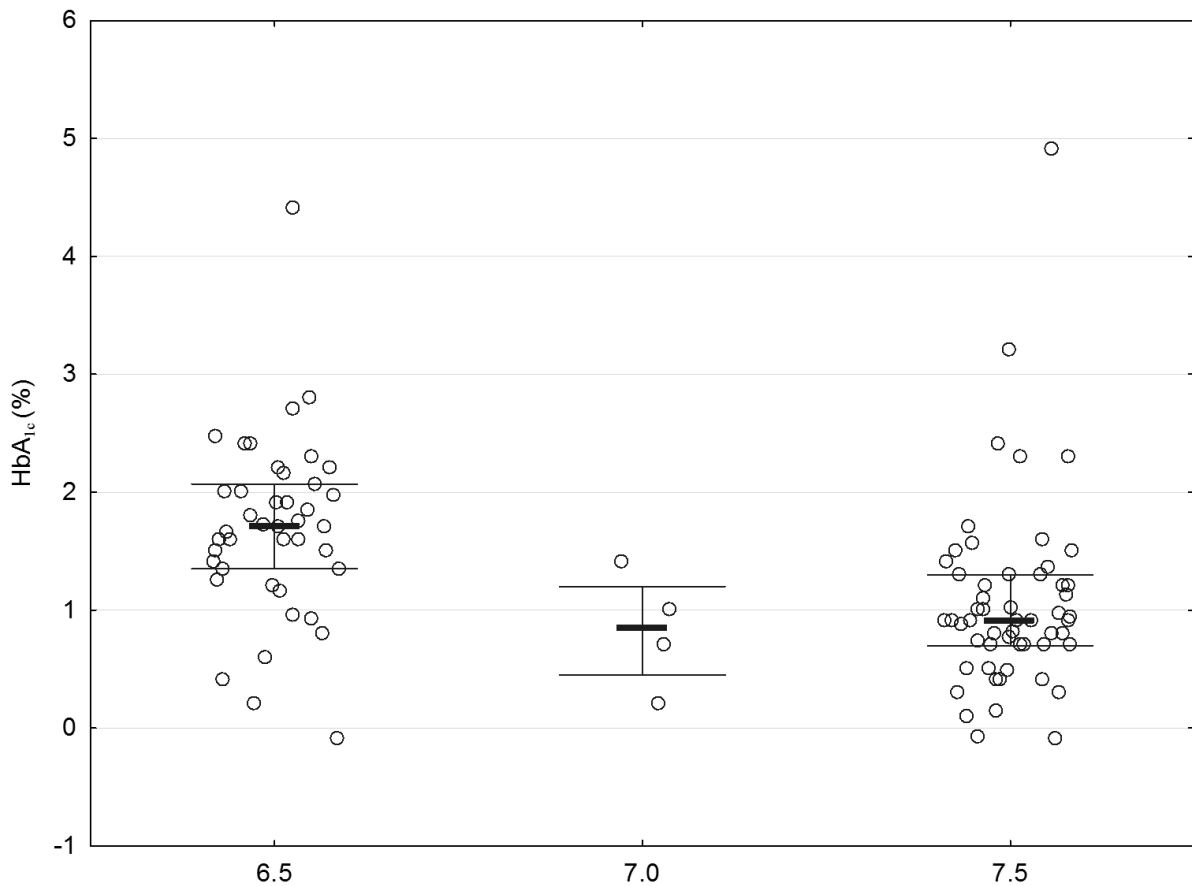

Figure 4 Comparison of  $\Delta\text{HbA}_{1c}$  regarding binding guideline values. (AKW,  $p=0.0001$ )

Table 2 Comparison of  $\Delta\text{HbA}_{1c}$  values regarding binding guideline levels. Values are given in % and mmol/mol in square brackets [mmol/mol]. (IQR – interquartile range, MWU – Mann-Whitney U-test, GLM – general linear model, AKW- KruskalWallis one-way analysis of variance)

| Subgroup of:                                   | Median (IQR) $\Delta\text{HbA}_{1c}$ in "6.5%"      | Median (IQR) $\Delta\text{HbA}_{1c}$ in "7.5%"  | p-value for comparison "6.5%" vs. "7.5%" (MWU; GLM with beta parameters) | Median (IQR) $\Delta\text{HbA}_{1c}$ in "7.0%"  | p-value for comparison "6.5%" vs. "7.5%" vs. "7.0%" (AKW) |
|------------------------------------------------|-----------------------------------------------------|-------------------------------------------------|--------------------------------------------------------------------------|-------------------------------------------------|-----------------------------------------------------------|
| High-income countries                          | 1.70 (1.352.00)%;<br>[18.15 (13.12-21.86) mmol/mol] | 0.90 (0.70-1.20)%; [8.19 (4.37-12.35) mmol/mol] | <0.0001                                                                  | 0.85 (0.45-1.20)%; [9.29 (4.92-13.12) mmol/mol] | <0.0001                                                   |
| Studies without $\text{HbA}_{1c}$ values > 10% | 1.70 (1.352.00)%;<br>[18.58 (14.76-21.86) mmol/mol] | 0.90 (0.70-1.20)%; [8.19 (4.37-12.35) mmol/mol] | <0.0001                                                                  | 0.85 (0.45-1.20)%; [9.29 (4.92-13.12) mmol/mol] | <0.0001                                                   |

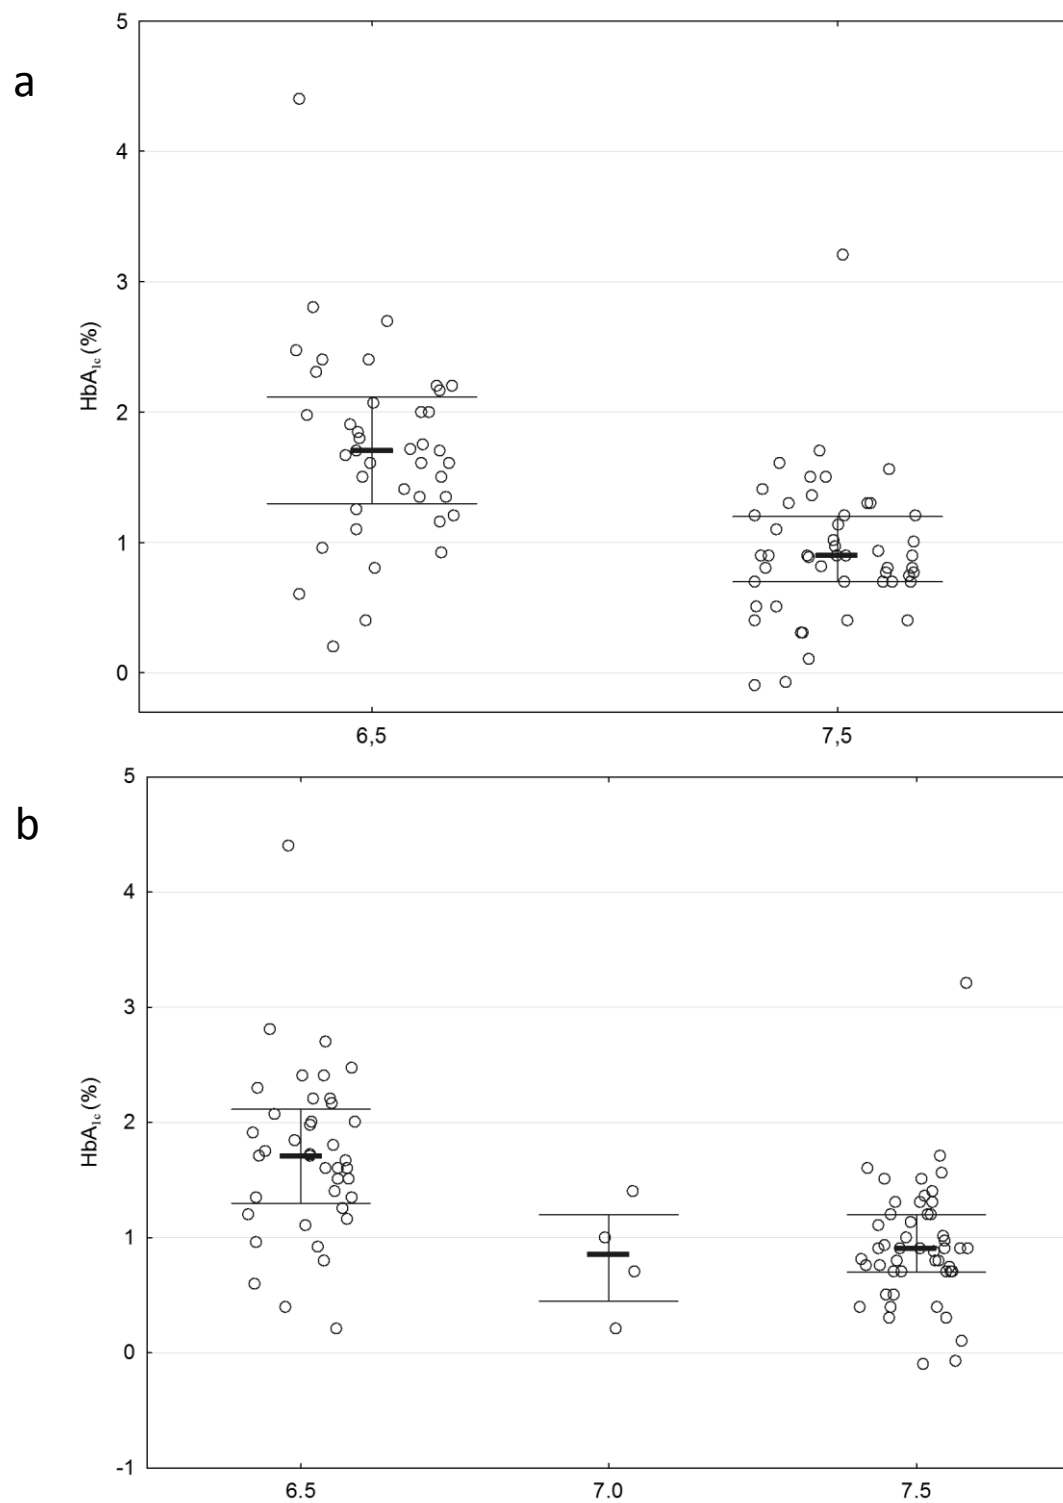

Figure 5 Comparison of  $\Delta$ HbA<sub>1c</sub> within high-income countries. "6.5" vs. "7.5" group **(a)** "6.5" vs. "7.0" vs. "7.5" **(b)**

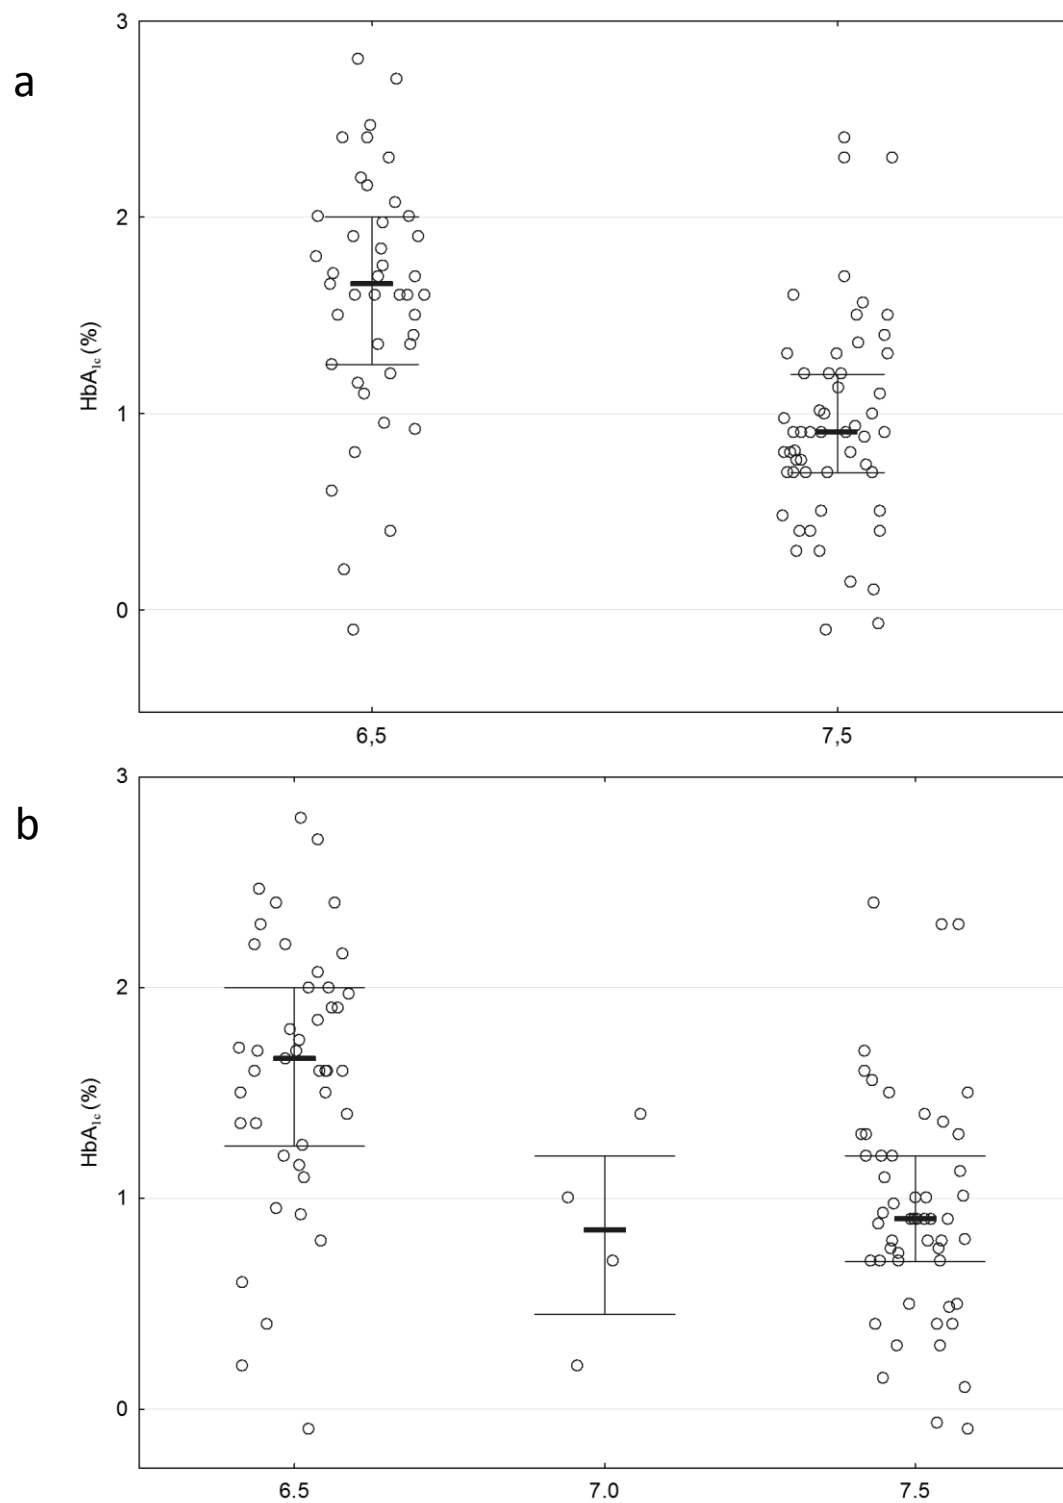

Figure 6 Comparison of  $\Delta$ HbA<sub>1c</sub> within studies without HbA<sub>1c</sub> values > 10% (85.79 mmol/mol).  
 "6.5" vs. "7.5" group **(a)** "6.5" vs. "7.0" vs. "7.5" **(b)**

## Supplementary material 4. Forest plots of delta HbA<sub>1c</sub>

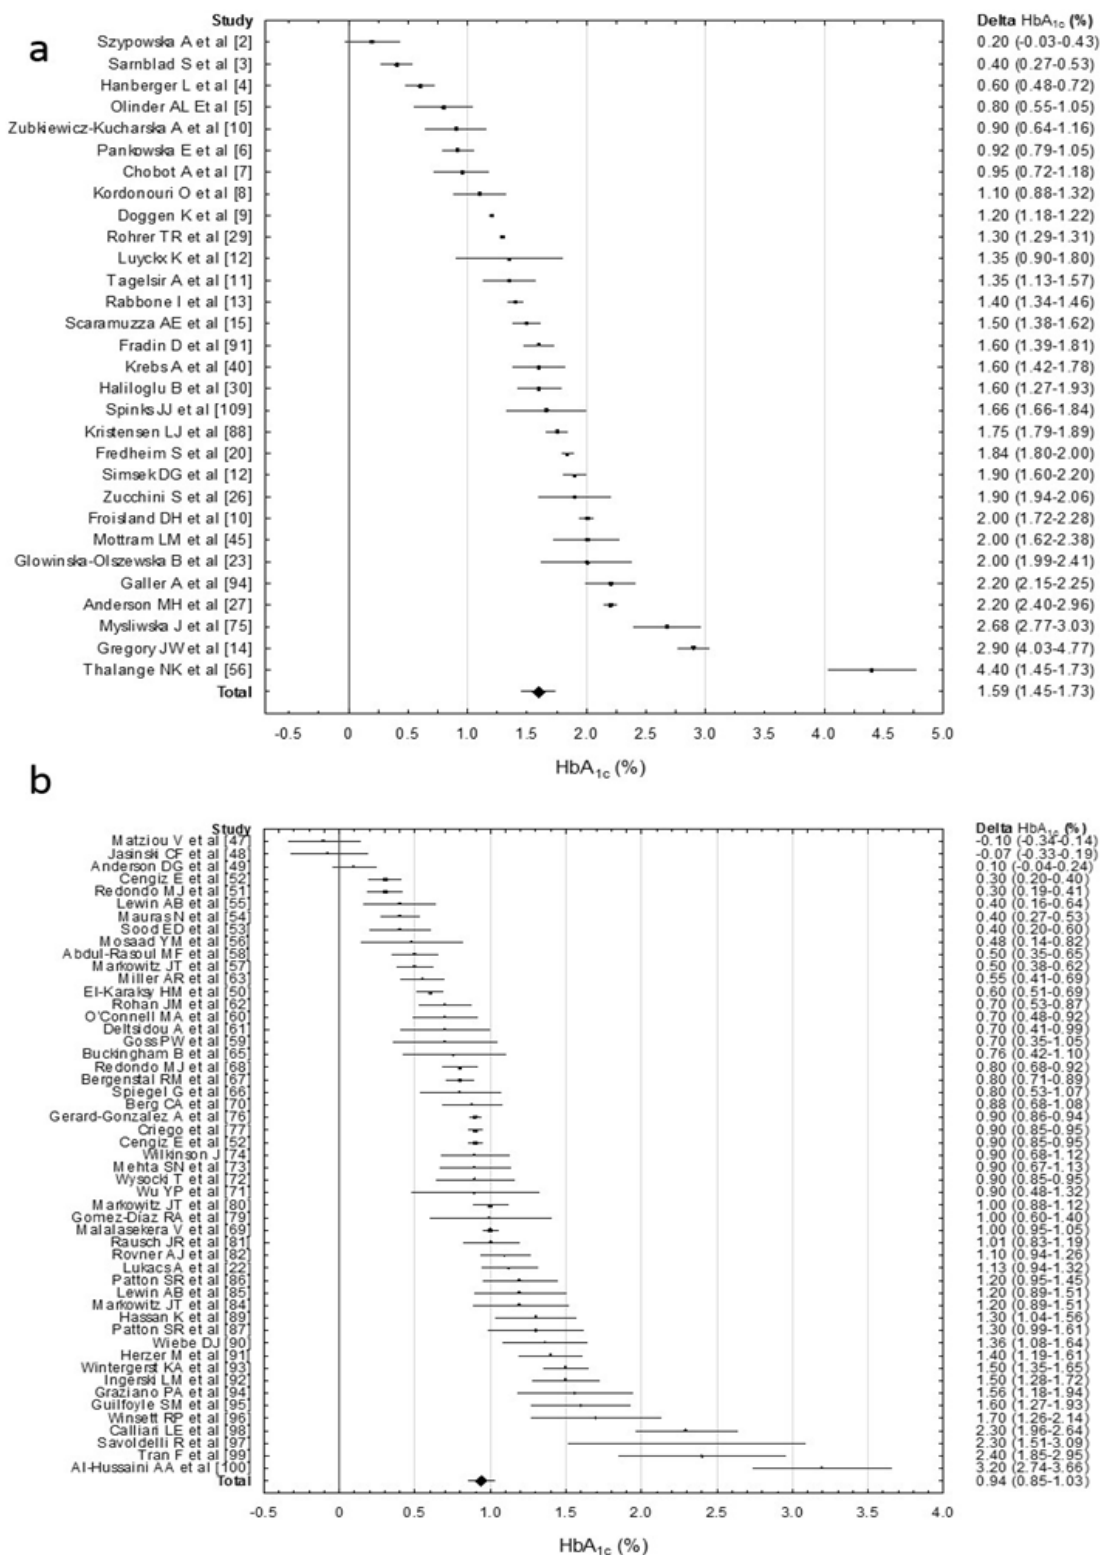

Figure 7 Forrest plot for difference between guideline and actual HbA<sub>1c</sub>: A. among studies of 6.5% as the guideline value B. among studies of 7.5% as the guideline value

### Supplementary material 5. Table with characteristics of included studies.

Characteristics of included studies with data extracted for quantitative analysis. Presented mean values concern the whole population of each study. Studies are presented in order of HbA<sub>1c</sub> guideline, mean HbA<sub>1c</sub> and study design. Regarding complications (diabetic ketoacidosis and hypoglycemia) “1” indicates that they occurred more frequently in the study population (specific subset of patients) than the literature reports [119, 120]. Null indicates in these columns on standard frequency. Regarding insulin therapy if more than a half of patients were treated with MDI then a study was appointed with “1” if more than 50% of patients were treated with CSII then a study was appointed with “0”. HbA<sub>1c</sub> – concentration of glycated hemoglobin A1c, GDP – gross domestic product, yrs. – years, DM – diabetes mellitus, MDI – multiple daily injections, CSII – continuous subcutaneous insulin infusion, NS – not stated in the paper

| No. | Authors             | Title                                                                                                                                                          | Journal article (1)/ conference proceeding (0) | Study design    | Country        | HbA <sub>1c</sub> value according to local guidelines | Mean HbA <sub>1c</sub> values in the study (%) | GDP per capita (\$) | Number of patients in the study | Mean age in the study (yrs.) | Mean duration of DM in the study (yrs.) | Type of insulin therapy [MDI > 50% - 1; CSII > 50% - 0] | Hypoglycaemia in the beginning of the study (1 - more frequent than in the literature. 0 - normal) | Diabetic ketoacidosis in the beginning of the study (1 - more frequent than in the literature. 0 - normal) |
|-----|---------------------|----------------------------------------------------------------------------------------------------------------------------------------------------------------|------------------------------------------------|-----------------|----------------|-------------------------------------------------------|------------------------------------------------|---------------------|---------------------------------|------------------------------|-----------------------------------------|---------------------------------------------------------|----------------------------------------------------------------------------------------------------|------------------------------------------------------------------------------------------------------------|
| 1   | Sumnik Z et al.     | Long-term improvement of fasting glycaemia after switching basal insulin from NPH to detemir in children with type 1 diabetes: a 1-year multicentre study [85] | 0                                              | Cohort study    | Czech Republic | 6.5                                                   | 6.40                                           | 18690               | 72                              | 10.60                        | NS                                      | 0                                                       | NS                                                                                                 | NS                                                                                                         |
| 2   | Szypowska A. et al. | Insulin requirement in preschoolers treated with insulin pumps at onset of type 1 diabetes mellitus [111]                                                      | 1                                              | Case series     | Poland         | 6.5                                                   | 6.70                                           | 23273               | 58                              | 3.3                          | 1                                       | NS                                                      | 0                                                                                                  | 0                                                                                                          |
| 3   | Sarnblad S et al.   | Diabetes care in Swedish schools - A national survey [82]                                                                                                      | 0                                              | Cross sectional | Sweden         | 6.5                                                   | 6.90                                           | 55040               | 317                             | 11.40                        | NS                                      | NS                                                      | NS                                                                                                 | NS                                                                                                         |
| 4   | Hanberger L et al.  | Health-related quality of life in intensively treated young                                                                                                    | 1                                              | Cross sectional | Sweden         | 6.5                                                   | 7.10                                           | 55040               | 400                             | 13.20                        | 5.10                                    | 1                                                       | NS                                                                                                 | NS                                                                                                         |

|    |                               |                                                                                                                                  |   |                      |                              |     |      |       |     |       |      |    |    |    |
|----|-------------------------------|----------------------------------------------------------------------------------------------------------------------------------|---|----------------------|------------------------------|-----|------|-------|-----|-------|------|----|----|----|
|    |                               | patients with type 1 diabetes [77]                                                                                               |   |                      |                              |     |      |       |     |       |      |    |    |    |
| 5  | Olinder AL. Et al.            | Missed bolus doses: devastating for metabolic control in CSII-treated adolescents with type 1 diabetes [110]                     | 1 | Cross sectional      | Sweden                       | 6.5 | 7.30 | 55040 | 90  | 14.80 | 7.90 | 0  | NS | NS |
| 6  | Pankowska E et al.            | Application of novel dual wave meal bolus and its impact on glycated haemoglobin A1c level in children with type 1 diabetes [78] | 1 | Cross sectional      | Poland                       | 6.5 | 7.42 | 23273 | 499 | 10.60 | 4.34 | 0  | NS | NS |
| 7  | Chobot A et al.               | Helicobacter pylori infection in type 1 diabetes children and adolescents using 13C urea breath test [28]                        | 0 | Cohort study         | Poland                       | 6.5 | 7.45 | 23273 | 129 | 13.30 | 4.43 | NS | NS | NS |
| 8  | Kordonouri O et al.           | Sensor augmented pump therapy from onset of type 1 diabetes: late follow-up results of the pediatric onset study [32]            | 1 | Interventional study | Germany Austria, Switzerland | 6.5 | 7.65 | 42597 | 131 | NS    | NS   | 0  | NS | NS |
| 9  | Doggen K et al.               | Care delivery and outcomes among Belgian children and adolescents with type 1 diabetes [24]                                      | 1 | Cross sectional      | Belgium                      | 6.5 | 7.70 | 43399 | 974 | 12.70 | 4.30 | 1  | 1  | 0  |
| 10 | Zubkiewicz-Kucharska A et al. | The efficacy of bolus calculator on metabolic control in pediatric patients using CSII [59]                                      | 0 | Cross sectional      | Poland                       | 6.5 | 7.75 | 23273 | 129 | NS    | NS   | NS | 0  | 0  |
| 11 | Tagelsir A et al.             | Dental caries and dental care level (restorative index) in children with diabetes mellitus type 1 [46]                           | 1 | Case-control study   | Belgium                      | 6.5 | 7.85 | 43399 | 52  | 9.84  | 4.61 | 0  | NS | NS |

|    |                      |                                                                                                                                                                                              |   |                 |                              |     |      |       |      |       |      |    |    |    |
|----|----------------------|----------------------------------------------------------------------------------------------------------------------------------------------------------------------------------------------|---|-----------------|------------------------------|-----|------|-------|------|-------|------|----|----|----|
| 12 | Luyckx K et al.      | Glycemic control, coping, and internalizing and externalizing symptoms in adolescents with type 1 diabetes [103]                                                                             | 1 | Cross sectional | Germany Austria, Switzerland | 6.5 | 7.85 | 42597 | 109  | 13.77 | 4.95 | NS | NS | NS |
| 13 | Rabbone I et al.     | Pandemic influenza A H1N1 in Italian children and adolescents with type 1 diabetes [74]                                                                                                      | 0 | Cross sectional | Italy                        | 6.5 | 7.90 | 33816 | 1461 | 13.00 | 6.00 | NS | NS | NS |
| 14 | Besser REJ et al.    | Preserved endogenous insulin secretion as measured by urinary C-peptide creatinine ratio is associated with improved HbA1c and less glycaemic variability in paediatric Type 1 diabetes [42] | 0 | Cross sectional | UK                           | 6.5 | 8.00 | 38920 | 135  | 13.20 | 3.90 | NS | NS | NS |
| 15 | Scaramuzza AE et al. | Use of integrated real-time continuous glucose monitoring/insulin pump system in children and adolescents with type 1 diabetes: A 3-year follow-up study [54]                                | 1 | Cohort study    | Italy                        | 6.5 | 8.00 | 33816 | 622  | 13.02 | 6.22 | 0  | 0  | 0  |
| 16 | Haliloglu B et al.   | Diabetes related problems and diabetic controls among the school children with type 1 diabetes mellitus living in Istanbul [30]                                                              | 0 | Cohort study    | Turkey                       | 6.5 | 8.10 | 5480  | 114  | NS    | 1.00 | 1  | NS | NS |
| 17 | Haugstvedt A et al.  | Fear of hypoglycemia in mothers and fathers of children with type 1 diabetes is associated with                                                                                              | 1 | Cross sectional | Norway                       | 6.5 | 8.10 | 99636 | 114  | 10.60 | 3.90 | NS | NS | NS |



|    |                    |                                                                                                                                                                |   |                    |                              |     |      |       |     |       |      |    |    |    |
|----|--------------------|----------------------------------------------------------------------------------------------------------------------------------------------------------------|---|--------------------|------------------------------|-----|------|-------|-----|-------|------|----|----|----|
|    |                    | poor glycaemic control and parental emotional distress: a population-based study [106]                                                                         |   |                    |                              |     |      |       |     |       |      |    |    |    |
| 18 | Krebs A et al.     | Cardiovascular risk in pediatric type 1 diabetes: Sex-specific intima-media thickening verified by automatic contour identification and analyzing systems [40] | 1 | Cross sectional    | Germany Austria, Switzerland | 6.5 | 8.10 | 42597 | 270 | 13.75 | 5.70 | NS | NS | NS |
| 19 | Fradin D et al.    | Association of the CpG Methylation Pattern of the Proximal Insulin Gene Promoter with Type 1 Diabetes [91]                                                     | 1 | Case-control study | France                       | 6.5 | 8.10 | 39746 | 485 | 12.10 | 7.50 | NS | NS | NS |
| 20 | Spinks JJ et al.   | Paediatric Diabetes services - evidence that expanding the workforce allows intensification of insulin regimens and improves glycaemic control [109]           | 1 | Case series        | UK                           | 6.5 | 8.16 | 38920 | 70  | NS    | NS   | NS | 0  | 0  |
| 21 | Huemer M et al.    | Low levels of asymmetric dimethylarginine in children with diabetes mellitus type I compared with healthy children [55]                                        | 1 | Cross sectional    | Germany Austria, Switzerland | 6.5 | 8.20 | 42597 | 85  | 12.30 | 4.08 | NS | NS | NS |
| 22 | Cherubini V et al. | Metabolic control in Italian children with type 1 diabetes: Is it changing during the years? Preliminary results of vikids study [84]                          | 0 | Cross sectional    | Italy                        | 6.5 | 8.20 | 33816 | 792 | NS    | NS   | NS | NS | NS |

|    |                      |                                                                                                                                                          |   |                 |                              |     |      |       |       |       |      |    |    |    |
|----|----------------------|----------------------------------------------------------------------------------------------------------------------------------------------------------|---|-----------------|------------------------------|-----|------|-------|-------|-------|------|----|----|----|
| 23 | van Vliet M et al.   | Overweight Is Highly Prevalent In Children with Type 1 Diabetes And Associates with Cardiometabolic Risk [72]                                            | 1 | Cross sectional | Netherlands                  | 6.5 | 8.22 | 45960 | 283   | 12.72 | 5.36 | 0  | NS | NS |
| 24 | Kristensen LJ et al. | Psychometric Evaluation of the Adherence in Diabetes Questionnaire [88]                                                                                  | 1 | Cross sectional | Denmark                      | 6.5 | 8.25 | 56364 | 766   | 12.30 | 5.20 | NS | NS | NS |
| 25 | Skrivarhaug T et al. | Norwegian Childhood Diabetes Registry: Childhood onset diabetes in Norway 1973-2012 [16]                                                                 | 1 | Cross sectional | Norway                       | 6.5 | 8.30 | 99636 | 2520  | NS    | NS   | 0  | 0  | 1  |
| 26 | Fredheim S et al.    | Diabetic ketoacidosis at the onset of type 1 diabetes is associated with future HbA1c levels [20]                                                        | 1 | Cross sectional | Denmark                      | 6.5 | 8.34 | 56364 | 2964  | 9.17  | 5.84 | 1  | 1  | 1  |
| 27 | Zucchini S et al.    | Usefulness of CGM with iPro2 in children with T1DM and correlations between Glucose Variability and metabolic control [26]                               | 0 | Cohort study    | Italy                        | 6.5 | 8.40 | 33816 | 70    | 13.80 | 7.40 | 1  | NS | NS |
| 28 | Simsek DG et al.     | Diabetes care, glycemic control, complications, and concomitant autoimmune diseases in children with type 1 diabetes in Turkey: A multicenter study [12] | 1 | Cohort study    | Turkey                       | 6.5 | 8.40 | 5480  | 1032  | 12.50 | 4.70 | 1  | 0  | 0  |
| 29 | Rohrer TR et al.     | Down's syndrome in diabetic patients aged <20 years: an analysis                                                                                         | 1 | Cross sectional | Germany Austria, Switzerland | 6.5 | 8.47 | 42597 | 42281 | 13.81 | 5.44 | NS | 0  | 0  |

|    |                              |                                                                                                                                                                                                        |   |                 |                              |     |      |       |      |       |      |    |    |    |
|----|------------------------------|--------------------------------------------------------------------------------------------------------------------------------------------------------------------------------------------------------|---|-----------------|------------------------------|-----|------|-------|------|-------|------|----|----|----|
|    |                              | of metabolic status, glycaemic control and autoimmunity in comparison with type 1 diabetes [104]                                                                                                       |   |                 |                              |     |      |       |      |       |      |    |    |    |
| 30 | Glowinska-Olszewska B et al. | Relationship between circulating endothelial progenitor cells and endothelial dysfunction in children with type 1 diabetes: a novel paradigm of early atherosclerosis in high-risk young patients [23] | 1 | Cohort study    | Poland                       | 6.5 | 8.50 | 23273 | 52   | 14.50 | 6.00 | NS | NS | NS |
| 31 | Mottram LM et al.            | Does physical activity and fitness influence glycaemic control and insulin requirement in children and young people with Type 1 diabetes? [45]                                                         | 0 | Cohort study    | UK                           | 6.5 | 8.50 | 38920 | 60   | 12.90 | 1.00 | NS | NS | NS |
| 32 | Galler A et al.              | Association Between Media Consumption Habits, Physical Activity, Socioeconomic Status, and Glycemic Control in Children, Adolescents, and Young Adults with Type 1 Diabetes [94]                       | 1 | Cross sectional | Germany Austria, Switzerland | 6.5 | 8.57 | 42597 | 222  | 13.7  | 6.1  | NS | NS | NS |
| 33 | Froisland DH et al.          | Health-related quality of life among Norwegian children and adolescents with type 1 diabetes on intensive insulin treatment: a                                                                         | 1 | Cohort study    | Norway                       | 6.5 | 8.66 | 99636 | 1952 | 13.83 | 5.43 | 0  | 0  | 1  |

|    |                     |                                                                                                                                                                         |   |                 |        |     |      |       |     |       |      |    |    |    |
|----|---------------------|-------------------------------------------------------------------------------------------------------------------------------------------------------------------------|---|-----------------|--------|-----|------|-------|-----|-------|------|----|----|----|
|    |                     | population-based study [10]                                                                                                                                             |   |                 |        |     |      |       |     |       |      |    |    |    |
| 34 | Andersson MH et al. | Continuous glucose monitoring may improve metabolic control in children and adolescents with type 1 diabetes [27]                                                       | 0 | Cohort study    | Sweden | 6.5 | 8.70 | 55040 | 103 | NS    | NS   | NS | NS | NS |
| 35 | Hughes CR et al.    | Sustained benefits of continuous subcutaneous insulin infusion [92]                                                                                                     | 1 | Case series     | UK     | 6.5 | 8.70 | 38920 | 460 | NS    | NS   | 0  | 0  | 1  |
| 36 | Dias R et al.       | The effect of insulin intensification on glycaemic control and lipid levels in children and young persons with type 1 diabetes differs in relation to ethnic group [33] | 0 | Cross sectional | UK     | 6.5 | 8.80 | 38920 | 222 | NS    | NS   | 1  | NS | NS |
| 37 | Hindmarsh PC et al. | Pediatric estimated average glucose from continuous glucose monitoring in children and young people with type 1 diabetes mellitus [80]                                  | 0 | Cohort study    | UK     | 6.5 | 8.90 | 38920 | 85  | 12.97 | NS   | NS | 0  | 0  |
| 38 | Hamersley S et al.  | How many paediatric patients are making endogenous insulin? [43]                                                                                                        | 0 | Cross sectional | UK     | 6.5 | 8.90 | 38920 | 137 | 13.20 | NS   | NS | NS | NS |
| 39 | Mysliwska J et al.  | The -174GG interleukin-6 genotype is protective from retinopathy and nephropathy in juvenile onset type 1 diabetes mellitus [75]                                        | 1 | Cohort study    | Poland | 6.5 | 8.97 | 23273 | 210 | 16.59 | 6.88 | NS | 0  | 0  |

|    |                    |                                                                                                                                                                                    |   |                      |          |     |       |       |     |       |      |    |    |    |
|----|--------------------|------------------------------------------------------------------------------------------------------------------------------------------------------------------------------------|---|----------------------|----------|-----|-------|-------|-----|-------|------|----|----|----|
| 40 | Branco S et al.    | Vitamin D deficiency in children and adolescents with type 1 diabetes [29]                                                                                                         | 0 | Cohort study         | Portugal | 6.5 | 9.20  | 20175 | 68  | NS    | 6.30 | NS | NS | NS |
| 41 | Gregory JW et al.  | Development and evaluation by a cluster randomised trial of a psychosocial intervention in children and teenagers experiencing diabetes: the DEPICTED study [14]                   | 1 | Interventional study | UK       | 6.5 | 9.30  | 38920 | 693 | 10.54 | 2.64 | NS | NS | NS |
| 42 | Thalange NK et al. | Clinical experience with prandial biphasic insulin aspart 30/70 three-times daily (T1D) in paediatric patients with type 1 diabetes (T1D): Results from a single-centre audit [56] | 0 | Cohort study         | UK       | 6.5 | 10.90 | 38920 | 113 | 11.80 | NS   | 1  | NS | NS |
| 43 | Urakami T et al.   | Association between sex, age, insulin regimens and glycemic control in children and adolescents with type 1 diabetes [69]                                                          | 1 | Cross sectional      | Japan    | 7.0 | 7.20  | 46731 | 103 | 16.80 | 1.00 | 1  | NS | NS |
| 44 | Urakami T et al.   | Influence of plasma glucagon levels on glycemic control in children with type 1 diabetes [52]                                                                                      | 1 | Case series          | Japan    | 7.0 | 7.70  | 46731 | 60  | 13.30 | 6.90 | NS | NS | NS |
| 45 | Nakamura N et al.  | Health-related and diabetes-related quality of life in Japanese children and adolescents with type 1 and type 2 diabetes [68]                                                      | 1 | Cross sectional      | Japan    | 7.0 | 8.00  | 46731 | 368 | 14.00 | 6.50 | NS | NS | NS |

|    |                       |                                                                                                                                                     |   |                 |           |     |      |       |     |       |      |    |    |    |
|----|-----------------------|-----------------------------------------------------------------------------------------------------------------------------------------------------|---|-----------------|-----------|-----|------|-------|-----|-------|------|----|----|----|
| 46 | Barzel M et al.       | Coparenting in Relation to Children's Psychosocial and Diabetes-Specific Adjustment [97]                                                            | 1 | Cross sectional | Canada    | 7.0 | 8.40 | 51206 | 61  | 10.70 | 4.90 | NS | 0  | 0  |
| 47 | Matziou V et al.      | Factors influencing the quality of life of young patients with diabetes [53]                                                                        | 1 | Cohort study    | Greece    | 7.5 | 7.40 | 22442 | 98  | 14.90 | 7.30 | 0  | 0  | NS |
| 48 | Jasinski CF et al.    | Healthcare cost of type 1 diabetes mellitus in new-onset children in a hospital compared to an outpatient setting [19]                              | 1 | Cross sectional | USA       | 7.5 | 7.43 | 51749 | 84  | 10.36 | 1.00 | 0  | NS | NS |
| 49 | Anderson DG et al.    | Multiple daily injections in young patients using the ezy-BICC bolus insulin calculation card, compared to mixed insulin and CSII [108]             | 1 | Cohort study    | Australia | 7.5 | 7.60 | 67442 | 368 | 12.4  | 4.7  | NS | 0  | 0  |
| 50 | El-Karakasy HM et al. | Prevalence of hepatic abnormalities in a cohort of Egyptian children with type 1 diabetes mellitus [66]                                             | 1 | Cross sectional | Egypt     | 7.5 | 7.64 | 3256  | 692 | 10.48 | 3.91 | 1  | NS | NS |
| 51 | Redondo MJ et al.     | Characteristics of pediatric type 1 diabetes (T1D) that predict HbA1c at one year [38]                                                              | 0 | Cross sectional | USA       | 7.5 | 7.80 | 51749 | 654 | 10.20 | 1.00 | NS | NS | 1  |
| 52 | Cengiz E et al.       | How common are episodes of diabetic ketoacidosis (DKA) and severe hypoglycemia (SH) in the first year of diagnosis with type 1 diabetes (T1D)? [39] | 0 | Cohort study    | USA       | 7.5 | 7.80 | 51749 | 795 | 9.20  | 1.00 | NS | 0  | 0  |

|    |                         |                                                                                                                                                                                         |   |                      |        |     |      |       |     |       |      |   |    |    |
|----|-------------------------|-----------------------------------------------------------------------------------------------------------------------------------------------------------------------------------------|---|----------------------|--------|-----|------|-------|-----|-------|------|---|----|----|
| 53 | Sood ED et al.          | Mother-father informant discrepancies regarding diabetes management: associations with diabetes-specific family conflict and glycemic control [13]                                      | 1 | Cohort study         | USA    | 7.5 | 7.90 | 51749 | 136 | 10.50 | 4.10 | 0 | NS | NS |
| 54 | Mauras N et al.         | A Randomized Clinical Trial to Assess the Efficacy and Safety of Real-Time Continuous Glucose Monitoring in the Management of Type 1 Diabetes in Young Children Aged 4 to 10 Years [93] | 1 | Interventional study | USA    | 7.5 | 7.90 | 51749 | 146 | 7.50  | 3.50 | 0 | 1  | NS |
| 55 | Lewin AB et al.         | Brief report: normative data on a structured interview for diabetes adherence in childhood [60]                                                                                         | 1 | Cohort study         | USA    | 7.5 | 7.90 | 51749 | 275 | 13.30 | 2.90 | 1 | 0  | NS |
| 56 | Mosaad YM et al.        | HLA-DQB1* alleles and genetic susceptibility to type 1 diabetes mellitus [34]                                                                                                           | 1 | Cross sectional      | Egypt  | 7.5 | 7.98 | 3256  | 85  | 12.52 | 2.50 | 1 | NS | 0  |
| 57 | Markowitz JT et al.     | Re-examining a measure of diabetes-related burden in parents of young people with Type 1 diabetes: The Problem Areas in Diabetes Survey - Parent Revised version (PAID-PR) [41]         | 1 | Cross sectional      | USA    | 7.5 | 8.00 | 51749 | 376 | 12.90 | 6.30 | 0 | NS | NS |
| 58 | M Abdul-Rasoul F et al. | Quality of Life of Children and Adolescents with                                                                                                                                        | 1 | Cohort study         | Kuwait | 7.5 | 8.00 | 56374 | 436 | 9.10  | 5.37 | 1 | NS | NS |

|    |                     |                                                                                                                                                           |   |                      |           |     |      |       |     |       |      |    |    |    |
|----|---------------------|-----------------------------------------------------------------------------------------------------------------------------------------------------------|---|----------------------|-----------|-----|------|-------|-----|-------|------|----|----|----|
|    |                     | Type 1 Diabetes in Kuwait [15]                                                                                                                            |   |                      |           |     |      |       |     |       |      |    |    |    |
| 59 | Goss PW et al.      | A 'radical' new rural model for pediatric diabetes care [62]                                                                                              | 1 | Cohort study         | Australia | 7.5 | 8.20 | 67442 | 61  | 13.90 | NS   | NS | NS | NS |
| 60 | O'Connell MA et al. | Poor adherence to integral daily tasks limits the efficacy of CSII in youth [49]                                                                          | 1 | Case series          | Australia | 7.5 | 8.20 | 67442 | 100 | 13.60 | 6.10 | NS | NS | NS |
| 61 | Deltsidou A et al.  | Age at Menarche and Menstrual Irregularities of Adolescents with Type 1 Diabetes [63]                                                                     | 1 | Case-control study   | Greece    | 7.5 | 8.20 | 22442 | 100 | 15.00 | NS   | 0  | NS | NS |
| 62 | Rohan JM et al.     | Identification of self-management patterns in pediatric type 1 diabetes using cluster analysis [50]                                                       | 1 | Cross sectional      | USA       | 7.5 | 8.20 | 51749 | 239 | 10.54 | 4.41 | 1  | NS | NS |
| 63 | Miller AR et al.    | Insulin dose changes in children attending a residential diabetic camp [98]                                                                               | 1 | Cross sectional      | USA       | 7.5 | 8.20 | 51749 | 256 | 11.60 | 4.67 | 0  | 0  | NS |
| 64 | Pingul MM et al.    | Pediatric diabetes outpatient center at Rhode Island hospital: The impact of changing initial diabetes education from inpatient to outpatient [44]        | 0 | Cohort study         | USA       | 7.5 | 8.24 | 51749 | 152 | 10.60 | 1.00 | NS | NS | NS |
| 65 | Buckingham B et al. | Effectiveness and safety study of the prototype 4th generation seven day continuous glucose monitoring system in youth with type 1 diabetes mellitus [58] | 0 | Interventional study | USA       | 7.5 | 8.26 | 51749 | 72  | 12.60 | 6.30 | 0  | NS | NS |



|    |                       |                                                                                                                                                                   |   |                      |           |     |      |       |     |       |      |    |    |    |
|----|-----------------------|-------------------------------------------------------------------------------------------------------------------------------------------------------------------|---|----------------------|-----------|-----|------|-------|-----|-------|------|----|----|----|
| 66 | Spiegel G et al.      | Randomized Nutrition Education Intervention to Improve Carbohydrate Counting in Adolescents with Type 1 Diabetes Study: Is More Intensive Education Needed? [113] | 1 | Interventional study | USA       | 7.5 | 8.30 | 51749 | 66  | 15.10 | 5.50 | 0  | NS | NS |
| 67 | Bergenstal RM et al.  | Effectiveness of sensor-augmented insulin-pump therapy in type 1 diabetes [101]                                                                                   | 1 | Interventional study | USA       | 7.5 | 8.30 | 51749 | 156 | 12.2  | 5.05 | 1  | 0  | 0  |
| 68 | Redondo MJ et al.     | Types of pediatric diabetes mellitus defined by anti-islet autoimmunity and random C-peptide at diagnosis [11]                                                    | 1 | Cohort study         | USA       | 7.5 | 8.30 | 51749 | 607 | 10.20 | 2.00 | NS | NS | 1  |
| 69 | Malalasekera V et al. | Potential renoprotective effects of a gluten-free diet in type 1 diabetes [79]                                                                                    | 1 | Cross sectional      | Australia | 7.5 | 8.31 | 67442 | 59  | 14.19 | 7.06 | NS | NS | NS |
| 70 | Berg CA et al.        | Parental Involvement and Adolescents' Diabetes Management: The Mediating Role of Self-Efficacy and Externalizing and Internalizing Behaviors [112]                | 1 | Cross sectional      | USA       | 7.5 | 8.38 | 51749 | 252 | 12.49 | 1.00 | 0  | NS | NS |
| 71 | Wu YP et al.          | Is insulin pump therapy better than injection for adolescents with diabetes? [64]                                                                                 | 1 | Cohort study         | USA       | 7.5 | 8.40 | 51749 | 62  | 14.20 | NS   | 1  | NS | NS |
| 72 | Wysocki T et al.      | Diabetes Problem Solving by Youths with Type 1 Diabetes and their Caregivers: Measurement,                                                                        | 1 | Cohort study         | USA       | 7.5 | 8.40 | 51749 | 114 | 12.10 | 5.80 | NS | NS | NS |

|    |                          |                                                                                                                                                                                                                                                          |   |                 |     |     |      |       |      |       |      |    |    |    |
|----|--------------------------|----------------------------------------------------------------------------------------------------------------------------------------------------------------------------------------------------------------------------------------------------------|---|-----------------|-----|-----|------|-------|------|-------|------|----|----|----|
|    |                          | Validation and Longitudinal Associations with Glycemic Control [86]                                                                                                                                                                                      |   |                 |     |     |      |       |      |       |      |    |    |    |
| 73 | Mehta SN et al.          | Dietary Behaviors Predict Glycemic Control in youth with type 1 diabetes [114]                                                                                                                                                                           | 1 | Cross sectional | USA | 7.5 | 8.40 | 51749 | 119  | 12.10 | 5.40 | 1  | NS | NS |
| 74 | Wilkinson J              | Factors affecting improved glycaemic control in youth using insulin pumps [100]                                                                                                                                                                          | 1 | Cross sectional | USA | 7.5 | 8.40 | 51749 | 150  | 13.6  | 7.1  | NS | 0  | 0  |
| 75 | Cengiz E et al.          | Resetting the bar: Frequency of severe hypoglycemia (SH) and diabetic ketoacidosis (DKA) among children with type 1 diabetes (T1D) in the T1D exchange registry [37]                                                                                     | 0 | Cohort study    | USA | 7.5 | 8.40 | 51749 | 4120 | 11.90 | 5.20 | NS | 0  | 1  |
| 76 | Gerard-Gonzalez A et al. | Comparison of autoantibody-positive and autoantibody-negative pediatric participants enrolled in the T1D Exchange clinic registry [17]                                                                                                                   | 1 | Cross sectional | USA | 7.5 | 8.40 | 51749 | 6737 | 7.80  | NS   | NS | NS | NS |
| 77 | Criego et al.            | Increased Body Mass Index (BMI) is associated with higher hemoglobin A1c (A1c) among 6-12 year olds but is not associated with total daily insulin dose per kg (TDI) in type 1 diabetes (T1D) participants enrolled in T1D Exchange Clinic Registry [57] | 0 | Cross sectional | USA | 7.5 | 8.43 | 51749 | 4427 | 12.90 | 5.80 | NS | 0  | 0  |

|    |                     |                                                                                                                                                   |   |                 |         |     |      |       |      |       |      |    |    |    |
|----|---------------------|---------------------------------------------------------------------------------------------------------------------------------------------------|---|-----------------|---------|-----|------|-------|------|-------|------|----|----|----|
| 78 | Lawrence JM et al.  | Diabetes-related quality of life and glycaemic control among youth with type 1 diabetes [81]                                                      | 0 | Cross sectional | USA     | 7.5 | 8.47 | 51749 | 2601 | 13.60 | 5.20 | NS | 0  | 0  |
| 79 | Gomez-Díaz RA et al | Association between carotid intima-media thickness, buccodental status, and glycemic control in pediatric type 1 diabetes [31]                    | 1 | Cross sectional | Mexico  | 7.5 | 8.50 | 9749  | 69   | 11.60 | 5.10 | NS | NS | NS |
| 80 | Markowitz JT et al. | Validation of an abbreviated adherence measure for young people with Type1 diabetes [47]                                                          | 1 | Cohort study    | USA     | 7.5 | 8.50 | 51749 | 338  | 12.50 | 5.40 | 1  | NS | NS |
| 81 | Rausch JR et al.    | Changes in Treatment Adherence and Glycemic Control During the Transition to Adolescence in Type 1 Diabetes [90]                                  | 1 | Cohort study    | USA     | 7.5 | 8.51 | 51749 | 225  | 12.62 | 6.46 | 0  | NS | NS |
| 82 | Rovner AJ et al.    | Development and validation of the type 1 diabetes nutrition knowledge survey [36]                                                                 | 1 | Cohort study    | USA     | 7.5 | 8.60 | 51749 | 282  | 13.30 | 6.40 | 0  | NS | NS |
| 83 | Lukacs A et al.     | Benefits of continuous subcutaneous insulin infusion on quality of life [22]                                                                      | 1 | Cross sectional | Hungary | 7.5 | 8.63 | 23236 | 239  | 13.36 | 6.03 | 1  | 1  | NS |
| 84 | Markowitz JT et al. | Brief screening tool for disordered eating in diabetes: Internal consistency and external validity in a contemporary sample of pediatric patients | 1 | Cross sectional | USA     | 7.5 | 8.70 | 51749 | 112  | 15.10 | 6.80 | 1  | NS | NS |

|    |                  |                                                                                                                                              |   |                      |     |     |      |       |     |       |      |    |    |    |
|----|------------------|----------------------------------------------------------------------------------------------------------------------------------------------|---|----------------------|-----|-----|------|-------|-----|-------|------|----|----|----|
|    |                  | with type 1 diabetes [70]                                                                                                                    |   |                      |     |     |      |       |     |       |      |    |    |    |
| 85 | Lewin AB et al.  | Validity and reliability of an adolescent and parent rating scale of type 1 diabetes adherence behaviors: The self-care inventory (SCI) [76] | 1 | Cohort study         | USA | 7.5 | 8.70 | 51749 | 164 | 14.60 | 4.70 | 0  | NS | NS |
| 86 | Patton SR et al. | Survey of Insulin Site Rotation in Youth With Type 1 Diabetes Mellitus [61]                                                                  | 1 | Cohort study         | USA | 7.5 | 8.70 | 51749 | 201 | 11.80 | 5.90 | 1  | NS | NS |
| 87 | Patton SR et al. | Frequency of Mealtime Insulin Bolus as a Proxy Measure of Adherence for Children and Youths with Type 1 Diabetes Mellitus [87]               | 1 | Interventional study | USA | 7.5 | 8.80 | 51749 | 100 | 12.70 | 1.00 | 0  | NS | NS |
| 88 | Cortina S et al. | Sociodemographic and psychosocial factors associated with continuous subcutaneous insulin infusion in adolescents with type 1 diabetes [102] | 1 | Cohort study         | USA | 7.5 | 8.80 | 51749 | 150 | 15.47 | 6.04 | 0  | NS | NS |
| 89 | Hassan K et al.  | Glycemic control in pediatric type 1 diabetes: Role of caregiver literacy [67]                                                               | 1 | Cross sectional      | USA | 7.5 | 8.80 | 51749 | 200 | 11.80 | 4.80 | 1  | NS | NS |
| 90 | Wiebe DJ         | Longitudinal Associations of Maternal Depressive Symptoms, Maternal Involvement, and Diabetes Management Across Adolescence [96]             | 1 | Cross sectional      | USA | 7.5 | 8.86 | 51749 | 82  | 12.79 | NS   | NS | NS | NS |

|    |                       |                                                                                                                                              |   |                 |        |     |      |       |     |       |      |    |    |    |
|----|-----------------------|----------------------------------------------------------------------------------------------------------------------------------------------|---|-----------------|--------|-----|------|-------|-----|-------|------|----|----|----|
| 91 | Herzer MH et al.      | Anxiety symptoms in adolescents with type 1 diabetes: association with Blood Glucose Monitoring and glycemic control [105]                   | 1 | Cross sectional | USA    | 7.5 | 8.90 | 51749 | 276 | 15.60 | 6.60 | 0  | NS | NS |
| 92 | Ingerski LM et al.    | Correlates of glycemic control and quality of life outcomes in adolescents with type 1 diabetes [65]                                         | 1 | Cohort study    | USA    | 7.5 | 9.00 | 51749 | 261 | 15.70 | 7.00 | 0  | NS | NS |
| 93 | Wintergerst KA et al. | The impact of health insurance coverage on pediatric diabetes management [71]                                                                | 1 | Cross sectional | USA    | 7.5 | 9.00 | 51749 | 701 | 13.50 | NS   | 1  | NS | NS |
| 94 | Graziano PA et al.    | Gender differences in the relationship between parental report of self-regulation skills and adolescents' management of type 1 diabetes [51] | 1 | Cohort study    | USA    | 7.5 | 9.06 | 51749 | 109 | 15.23 | 5.06 | NS | NS | NS |
| 95 | Guilfoyle SM et al.   | Blood glucose monitoring and glycemic control in adolescents with type 1 diabetes: meter downloads versus self-report [95]                   | 1 | Cohort study    | USA    | 7.5 | 9.10 | 51749 | 143 | 16.00 | 6.50 | 0  | NS | NS |
| 96 | Winsett RP et al.     | Adolescent self-efficacy and resilience in participants attending A diabetes camp [99]                                                       | 1 | Cohort study    | USA    | 7.5 | 9.20 | 51749 | 81  | 13.40 | 6.63 | 0  | NS | NS |
| 97 | Savoldelli R et al.   | Vitamin D insufficiency in a Brazilian type 1 diabetes mellitus pediatric population [73]                                                    | 0 | Case series     | Brazil | 7.5 | 9.80 | 14987 | 117 | NS    | NS   | NS | 0  | 0  |

|     |                                                                                 |                                                                                                                             |   |                      |               |               |       |               |     |       |      |    |    |    |
|-----|---------------------------------------------------------------------------------|-----------------------------------------------------------------------------------------------------------------------------|---|----------------------|---------------|---------------|-------|---------------|-----|-------|------|----|----|----|
| 98  | Calliari LE et al.                                                              | Ten year evolution on diagnosis and treatment of type 1 diabetes mellitus in an university center in Sao Paulo, Brazil [83] | 0 | Cohort study         | Brazil        | 7.5           | 9.80  | 14987         | 132 | 13.3  | 6.50 | NS | 0  | NS |
| 99  | Tran F et al.                                                                   | Glycaemic control in children with neonatal diabetes and type 1 diabetes in Vietnam [48]                                    | 1 | Cross sectional      | Vietnam       | 7.5           | 9.90  | 1755          | 93  | 11.50 | 2.60 | 1  | 0  | NS |
| 100 | Al-Hussaini AA et al.                                                           | Is There an Association between Type 1 Diabetes in Children and Gallbladder Stones Formation? [21]                          | 1 | Cohort study         | Saudi Arabia  | 7.5           | 10.70 | 25136         | 105 | 8.50  | 2.20 | NS | NS | NS |
| 101 | Mukama LJ et al.                                                                | Improved glycemic control and acute complications among children with type 1 diabetes mellitus in Moshi, Tanzania [18]      | 1 | Cross sectional      | Tanzania      | 7.5           | 12.40 | 609           | 81  | NS    | 1.00 | 1  | 0  | 1  |
| 102 | Juvenile Diabetes Research Foundation Continuous Glucose Monitoring Study Group | Effectiveness of continuous glucose monitoring in a clinical care environment [107]                                         | 1 | Interventional study | International | International | 7.80  | International | 50  | NS    | NS   | NS | 1  | NS |
| 103 | Phillip M et al.                                                                | Nocturnal Glucose Control with an Artificial Pancreas at a Diabetes Camp [89]                                               | 1 | Interventional study | International | International | 8.00  | International | 56  | 13.8  | 7    | 0  | 0  | 0  |
| 104 | de Wit M et al.                                                                 | Assessing diabetes-related quality of life of youth with type 1 diabetes in routine clinical                                | 1 | Cohort study         | International | International | 8.10  | International | 84  | 14.40 | 6.40 | NS | NS | NS |

|     |                    |                                                                                                                                                     |   |              |               |               |      |               |     |       |      |   |    |    |
|-----|--------------------|-----------------------------------------------------------------------------------------------------------------------------------------------------|---|--------------|---------------|---------------|------|---------------|-----|-------|------|---|----|----|
|     |                    | care: the MIND Youth Questionnaire (MY-Q) [25]                                                                                                      |   |              |               |               |      |               |     |       |      |   |    |    |
| 105 | Adolfsson P et al. | Safety and patient perception of an insulin pen with simple memory function for children and adolescents with type 1 diabetes the REMIND study [35] | 1 | Cohort study | International | International | 8.40 | International | 354 | 12.00 | 3.80 | 1 | NS | NS |

- [1] Sumnik Z VJ, Brazdova L, Skvor J. Long-term improvement of fasting glycaemia after switching basal insulin from NPH to determir in children with type 1 diabetes: a 1-year multicentre study. *Casopis lekaru ceskych* 2009; 147 (8): 421-425
- [2] Szypowska A, Lipka M, Blazik M, Groele L, Pankowska E. Insulin requirement in preschoolers treated with insulin pumps at the onset of type 1 diabetes mellitus. *Acta paediatrica* 2009; 98: 527-530
- [3] Sarnblad S BL, Detlofsson I, Jonsson A, Forsander G. Diabetes care in Swedish schools - A national survey. *Pediatric diabetes* 2009; 10: 67-68
- [4] Hanberger L, Ludvigsson J, Nordfeldt S. Health-related quality of life in intensively treated young patients with type 1 diabetes. *Pediatric diabetes* 2009; 10: 374-381
- [5] Olinder AL, Kernell A, Smide B. Missed bolus doses: devastating for metabolic control in CSII-treated adolescents with type 1 diabetes. *Pediatric diabetes* 2009; 10: 142-148
- [6] Pankowska E, Szypowska A, Lipka M, Szpotanska M, Blazik M, Groele L. Application of novel dual wave meal bolus and its impact on glycated hemoglobin A1c level in children with type 1 diabetes. *Pediatric diabetes* 2009; 10: 298-303
- [7] Chobot A, Skala-Zamorowska E, Bak-Drabik K, Krzywicka A, Kwiecien J, Polanska J. *Helicobacter pylori* infection in type 1 diabetes children and adolescents using 13C urea breath test. *Pediatric diabetes* 2012; 13: 99

- [8] Kordonouri O, Hartmann R, Pankowska E et al. Sensor augmented pump therapy from onset of type 1 diabetes: late follow-up results of the Pediatric Onset Study. *Pediatric diabetes* 2012; 13: 515-518
- [9] Doggen K, Debacker N, Beckers D et al. Care delivery and outcomes among Belgian children and adolescents with type 1 diabetes. *European journal of pediatrics* 2012; 171: 1679-1685
- [10] Zubkiewicz-Kucharska A SB, Chrzanowska J, Noczynska A. The efficacy of bolus calculator on metabolic control in pediatric patients using CSII. . *Diabetes Technology and Therapeutics* 2011; 13 [Suppl. 2]: 286
- [11] Tagelsir A, Cauwels R, van Aken S, Vanobbergen J, Martens LC. Dental caries and dental care level (restorative index) in children with diabetes mellitus type 1. *International journal of pediatric dentistry / the British Paedodontic Society [and] the International Association* 2011; 21:13-22
- [12] Luyckx K, Seiffge-Krenke I, Hampson SE. Glycemic control, coping, and internalizing and externalizing symptoms in adolescents with type 1 diabetes: a cross-lagged longitudinal approach. *Diabetes care* 2010; 33: 1424-1429
- [13] Rabbone I SA, Iafusco D, Bonfanti R et al. Pandemic influenza A H1N1 in Italian children and adolescents with type 1 diabetes. *Pediatric diabetes* 2010; 11 [Suppl. 14]: 49
- [14] Besser REJ CP, Shields BM, McDonald TJ, Jones AG, Knight BA, Hattersley AT. Preserved endogenous insulin secretion as measured by urinary C-peptide creatinine ratio is associated with improved HbA1c and less glycaemic variability in pediatric Type 1 diabetes. *Diabetic Medicine* 2012; 29 [Supp. 1]: 88
- [15] Scaramuzza AE, Iafusco D, Rabbone I et al. Use of integrated real-time continuous glucose monitoring/insulin pump system in children and adolescents with type 1 diabetes: a 3-year follow-up study. *Diabetes technology & therapeutics* 2011; 13: 99-103
- [16] Haliloglu B AE, Atay Z, Guran T, Bereket A, Turan S. Diabetes related problems and diabetic controls among the school children with type 1 diabetes mellitus living in Istanbul. *Pediatric diabetes* 2012; 13 [Suppl 17]: 1-173
- [17] Haugstvedt A, Wentzel-Larsen T, Graue M, Sovik O, Rokne B. Fear of hypoglycemia in mothers and fathers of children with Type 1 diabetes is associated with poor glycaemic control and parental emotional distress: a population-based study. *Diabetic medicine: a journal of the British Diabetic Association* 2010; 27: 72-78
- [18] Krebs A, Schmidt-Trucksass A, Doerfer J et al. Cardiovascular risk in pediatric type 1 diabetes: sex-specific intima-media thickening verified by automatic contour identification and analyzing systems. *Pediatric diabetes* 2012; 13: 251-258



- [19] Galler A, Lindau M, Ernert A, Thalemann R, Raile K. Associations between media consumption habits, physical activity, socioeconomic status, and glycemic control in children, adolescents, and young adults with type 1 diabetes. *Diabetes care* 2011; 34: 2356-2359
- [20] Spinks JJ, Haest J, Ross K, London R, Edge JA. Paediatric Diabetes Services--evidence that expanding the workforce allows intensification of insulin regimens and improves glycaemic control. *Archives of disease in childhood* 2009; 94: 646-647
- [21] Huemer M, Simma B, Mayr D et al. Low levels of asymmetric dimethylarginine in children with diabetes mellitus type I compared with healthy children. *The Journal of pediatrics* 2011; 158: 602-606
- [22] Cherubini V GR, Mosca A, Bonfanti R et al. Metabolic control in Italian children with type 1 diabetes: Is it changing during the years? Preliminary results of vikids study. *Pediatric diabetes* 2009; 10: 20
- [23] van Vliet M, Van der Heyden JC, Diamant M et al. Overweight is highly prevalent in children with type 1 diabetes and associates with cardiometabolic risk. *The Journal of pediatrics* 2010; 156: 923-929
- [24] Kristensen LJ, Thastum M, Mose AH, Birkebaek NH. Psychometric evaluation of the adherence in diabetes questionnaire. *Diabetes care* 2012; 35: 2161-2166
- [25] Skriverhaug T. Norwegian Childhood Diabetes Registry: Childhood onset diabetes in Norway 1973-2012. *Norsk Epidemiologi* 2013; 23: 23-27
- [26] Fredheim S, Johannesen J, Johansen A et al. Diabetic ketoacidosis at the onset of type 1 diabetes is associated with future HbA1c levels. *Diabetologia* 2013; 56: 995-1003
- [27] Zucchini S SM, Predieri B, Iughetti L et al. Usefulness of CGM with iPro2 in children with T1DM and correlations between Glucose Variability and metabolic control. *Pediatric diabetes* 2012; 13
- [28] Simsek DG, Ayca Z, Ozen S, et al. Diabetes care, glycemic control, complications, and concomitant autoimmune diseases in children with type 1 diabetes in Turkey: a multicenter study. *Journal of clinical research in pediatric endocrinology* 2013; 5: 20-26
- [29] Rohrer TR, Hennes P, Thon A et al. Down's syndrome in diabetic patients aged <20 years: an analysis of metabolic status, glycaemic control and autoimmunity in comparison with type 1 diabetes. *Diabetologia* 2010; 53: 1070-1075

- [30] Glowinska-Olszewska B, Moniuszko M, Hryniewicz A et al. Relationship between circulating endothelial progenitor cells and endothelial dysfunction in children with type 1 diabetes: a novel paradigm of early atherosclerosis in high-risk young patients. *European journal of endocrinology / European Federation of Endocrine Societies* 2013; 168: 153-161
- [31] Mottram LM JR, Shield JPH, Burren CP. Does physical activity and fitness influence glycaemic control and insulin requirement in children and young people with Type 1 diabetes? *Diabetic Medicine* 2011; 47
- [32] Urakami T, Suzuki J, Yoshida A et al. Association between Sex, Age, Insulin Regimens and Glycemic Control in Children and Adolescents with Type 1 Diabetes. *Clinical pediatric endocrinology: case reports and clinical investigations: official journal of the Japanese Society for Pediatric Endocrinology* 2010; 19: 1-6
- [33] Froisland DH, Graue M, Markestad T, Skrivarhaug T, Wentzel-Larsen T, Dahl-Jorgensen K. Health-related quality of life among Norwegian children and adolescents with type 1 diabetes on intensive insulin treatment: a population-based study. *Acta paediatrica* 2013
- [34] Andersson MH L-OM, Carlsson A. Continuous glucose monitoring may improve metabolic control in children and adolescents with type 1 diabetes. *Pediatric diabetes* 2012; 13
- [35] Hughes CR, McDowell N, Cody D, Costigan C. Sustained benefits of continuous subcutaneous insulin infusion. *Archives of disease in childhood* 2012; 97: 245-247
- [36] Dias R BF, Wyatt C, Cheema S, Allgrove J, Amin R. The effect of insulin intensification on glycaemic control and lipid levels in children and young persons with type 1 diabetes differs in relation to ethnic group. *Hormone Research in Pediatrics* 2012; 78: 58-59
- [37] Hindmarsh PC. Pediatric estimated average glucose from continuous glucose monitoring in children and young people with type 1 diabetes mellitus. *Diabetes* 2009; 58
- [38] Hamersley S SM, Besser REJ, McDonald TJ, Hattersley AT. How many pediatric patients are making endogenous insulin? *Diabetic Medicine* 2012; 29
- [39] Mysliwska J, Zorena K, Mysliwiec M, Malinowska E, Raczynska K, Balcerska A. The -174GG interleukin-6 genotype is protective from retinopathy and nephropathy in juvenile onset type 1 diabetes mellitus. *Pediatric research* 2009; 66: 341-345
- [40] Branco S RH, Costa C, Correia C, Fontoura M. Vitamin D deficiency in children and adolescents with type 1 diabetes. *Pediatric diabetes* 2012; 13

- [41] Gregory J, Robling M, Bennert K et al. Development and evaluation by a cluster randomised trial of a psychosocial intervention in children and teenagers experiencing diabetes: the DEPICTED study. *Health technology assessment* 2011; 15: 1-202
- [42] Thalange NK L-WH, Datta V, Stella P. Clinical experience with prandial biphasic insulin aspart 30/70 three-times daily (T1D) in paediatric patients with type 1 diabetes (T1D): Results from a single-centre audit. *Pediatric Diabetes* 2011; 12: 124
- [43] Fradin D, Le Fur S, Mille C et al. Association of the CpG methylation pattern of the proximal insulin gene promoter with type 1 diabetes. *PloS one* 2012; 7: e36278
- [44] Urakami T, Nagano N, Suzuki J, Yoshida A, Takahashi S, Mugishima H. Influence of plasma glucagon levels on glycemic control in children with type 1 diabetes. *Pediatrics international: official journal of the Japan Pediatric Society* 2011; 53: 46-49
- [45] Nakamura N, Sasaki N, Kida K, Matsuura N. Health-related and diabetes-related quality of life in Japanese children and adolescents with type 1 and type 2 diabetes. *Pediatrics international: official journal of the Japan Pediatric Society* 2010; 52: 224-229
- [46] Barzel M, Reid GJ. Coparenting in relation to children's psychosocial and diabetes-specific adjustment. *Journal of pediatric psychology* 2011; 36: 618-629
- [47] Matziou V, Tsoumakas K, Vlahioti E et al. Factors influencing the quality of life of young patients with diabetes. *Journal of diabetes* 2011; 3: 82-90
- [48] Jasinski CF, Rodriguez-Monguio R, Tonyushkina K, Allen H. Healthcare cost of type 1 diabetes mellitus in new-onset children in a hospital compared to an outpatient setting. *BMC pediatrics* 2013; 13: 55
- [49] Anderson DG. Multiple daily injections in young patients using the ezy-BICC bolus insulin calculation card, compared to mixed insulin and CSII. *Pediatric diabetes* 2009; 10: 304-309
- [50] El-Karaksy HM, Anwar G, Esmat G et al. Prevalence of hepatic abnormalities in a cohort of Egyptian children with type 1 diabetes mellitus. *Pediatric diabetes* 2010; 11: 462-470
- [51] Redondo MJ W-JS, Buckingham B, Kollman C et al. Characteristics of pediatric type 1 diabetes (T1D) that predict HbA1c at one year. *Diabetes* 2012; 61: A329-A330
- [52] Cengiz E W-JS, Kollman C, Haymond M, Klingensmith G, Lee J, Tamborlane W. How common are episodes of diabetic ketoacidosis (DKA) and severe hypoglycemia (SH) in the first year of diagnosis with type 1 diabetes (T1D)? *Diabetes* 2012; 61: A328-A329

- [53] Sood ED, Pendley JS, Delamater AM, Rohan JM, Pulgaron ER, Drotar D. Mother-father informant discrepancies regarding diabetes management: associations with diabetes-specific family conflict and glycemic control. *Health psychology: official journal of the Division of Health Psychology, American Psychological Association* 2012; 31: 571-579
- [54] Mauras N, Beck R, Xing D et al. A randomized clinical trial to assess the efficacy and safety of real-time continuous glucose monitoring in the management of type 1 diabetes in young children aged 4 to <10 years. *Diabetes care* 2012; 35: 204-210
- [55] Lewin AB, Storch EA, Williams LB, Duke DC, Silverstein JH, Geffken GR. Brief report: normative data on a structured interview for diabetes adherence in childhood. *Journal of pediatric psychology* 2010; 35: 177-182
- [56] Mosaad YM, Auf FA, Metwally SS et al. HLA-DQB1\* alleles and genetic susceptibility to type 1 diabetes mellitus. *World journal of diabetes* 2012; 3: 149-155
- [57] Markowitz JT, Volkening LK, Butler DA, Antisdel-Lomaglio J, Anderson BJ, Laffel LM. Re-examining a measure of diabetes-related burden in parents of young people with Type 1 diabetes: the Problem Areas in Diabetes Survey - Parent Revised version (PAID-PR). *Diabetic medicine: a journal of the British Diabetic Association* 2012; 29: 526-530
- [58] Abdul-Rasoul M, AlOtaibi F, Abdulla A, Rahme Z, AlShawaf F. Quality of life of children and adolescents with type 1 diabetes in Kuwait. *Medical principles and practice: international journal of the Kuwait University, Health Science Centre* 2013; 22: 379-384
- [59] Goss PW, Paterson MA, Renalson J. A 'radical' new rural model for pediatric diabetes care. *Pediatric diabetes* 2010; 11: 296-304
- [60] O'Connell MA, Donath S, Cameron FJ. Poor adherence to integral daily tasks limits the efficacy of CSII in youth. *Pediatric diabetes* 2011; 12: 556-559
- [61] Deltsidou A. Age at menarche and menstrual irregularities of adolescents with type 1 diabetes. *Journal of pediatric and adolescent gynecology* 2010; 23: 162-167
- [62] Rohan JM, Delamater A, Pendley JS, Dolan L, Reeves G, Drotar D. Identification of self-management patterns in pediatric type 1 diabetes using cluster analysis. *Pediatric diabetes* 2011; 12: 611-618
- [63] Miller AR, Nebesio TD, DiMeglio LA. Insulin dose changes in children attending a residential diabetes camp. *Diabetic medicine: a journal of the British Diabetic Association* 2011; 28: 480-486

- [64] Pingul MM RS, Gopalakrishnan G, Plante W, Boney CM, Quintos JBQ. Pediatric diabetes outpatient center at Rhode Island hospital: The impact of changing initial diabetes education from inpatient to outpatient. *Endocrine Reviews* 2011; 32
- [65] Buckingham B NK, Benassi K, Realsen J, Liljenquist D, Chase P. Effectiveness and safety study of the prototype 4th generation seven day continuous glucose monitoring system in youth with type 1 diabetes mellitus. *Diabetologia* 2011; 54 [Suppl1]: 352
- [66] Spiegel G, Bortsov A, Bishop FK et al. Randomized nutrition education intervention to improve carbohydrate counting in adolescents with type 1 diabetes study: is more intensive education needed? *Journal of the Academy of Nutrition and Dietetics* 2012; 112: 1736-1746
- [67] Bergenstal RM, Tamborlane WV, Ahmann A et al. Effectiveness of sensor-augmented insulin-pump therapy in type 1 diabetes. *The New England journal of medicine* 2010; 363: 311-320
- [68] Redondo MJ, Rodriguez LM, Escalante M, Smith EO, Balasubramanyam A, Haymond MW. Types of pediatric diabetes mellitus defined by anti-islet autoimmunity and random C-peptide at diagnosis. *Pediatric diabetes* 2013; 14: 333-340
- [69] Malalasekera V, Cameron F, Grixti E, Thomas MC. Potential reno-protective effects of a gluten-free diet in type 1 diabetes. *Diabetologia* 2009; 52: 798-800
- [70] Berg CA, King PS, Butler JM, Pham P, Palmer D, Wiebe DJ. Parental involvement and adolescents' diabetes management: the mediating role of self-efficacy and externalizing and internalizing behaviors. *Journal of pediatric psychology* 2011; 36: 329-339
- [71] Wu YP, Graves MM, Roberts MC, Mitchell AC. Is insulin pump therapy better than injection for adolescents with diabetes? *Diabetes research and clinical practice* 2010; 89: 121-125
- [72] Wysocki T, Iannotti R, Weissberg-Benchell J et al. Diabetes problem solving by youths with type 1 diabetes and their caregivers: measurement, validation, and longitudinal associations with glycemic control. *Journal of pediatric psychology* 2008; 33: 875-884
- [73] Mehta SN, Volkening LK, Anderson BJ et al. Dietary behaviors predict glycemic control in youth with type 1 diabetes. *Diabetes care* 2008; 31: 1318-1320
- [74] Wilkinson J, McFann K, Chase HP. Factors affecting improved glycaemic control in youth using insulin pumps. *Diabetic medicine: a journal of the British Diabetic Association* 2010; 27: 1174-1177
- [75] Cengiz E WJ, Miller K. Resetting the bar: Frequency of severe hypoglycemia (SH) and diabetic ketoacidosis (DKA) among children with type 1 diabetes (T1D) in the T1D exchange registry. *Clinical and Translational Science* 2012; 12 [Suppl. 15]: 40-143

- [76] Gerard-Gonzalez A, Gitelman SE, Cheng P et al. Comparison of autoantibody-positive and autoantibody-negative pediatric participants enrolled in the T1D Exchange clinic registry. *Journal of diabetes* 2013; 5: 216-223
- [77] Criego A BK, Miller KM. Increased Body Mass Index (BMI) is associated with higher hemoglobin A1c (A1c) among 6-12 year olds but is not associated with total daily insulin dose per kg (TDI) in type 1 diabetes (T1D) participants enrolled in T1D Exchange Clinic Registry. *Pediatric diabetes* 2011; 12:34
- [78] Lawrence JM AA, Imperatore G, Mayer-Davis EJ, Seid M, Waitzfelder B, Yi-Frazier J. Diabetes-related quality of life and glycaemic control among youth with type 1 diabetes. *Diabetologia* 2009; 52
- [79] Gomez-Diaz RA, Ramirez-Soriano E, Tanus Hajj J et al. Association between carotid intima-media thickness, buccodental status, and glycemic control in pediatric type 1 diabetes. *Pediatric diabetes* 2012; 13: 552-558
- [80] Markowitz JT, Laffel LM, Volkening LK et al. Validation of an abbreviated adherence measure for young people with Type 1 diabetes. *Diabetic medicine: a journal of the British Diabetic Association* 2011; 28: 1113-1117
- [81] Rausch JR, Hood KK, Delamater A et al. Changes in treatment adherence and glycemic control during the transition to adolescence in type 1 diabetes. *Diabetes care* 2012; 35: 1219-1224
- [82] Rovner AJ, Nansel TR, Mehta SN, Higgins LA, Haynie DL, Laffel LM. Development and validation of the type 1 diabetes nutrition knowledge survey. *Diabetes care* 2012; 35: 1643-1647
- [83] Lukacs A, Kiss-Toth E, Varga B, Soos A, Takac P, Barkai L. Benefits of continuous subcutaneous insulin infusion on quality of life. *International journal of technology assessment in health care* 2013; 29: 48-52
- [84] Markowitz JT, Butler DA, Volkening LK, Antisdel JE, Anderson BJ, Laffel LM. Brief screening tool for disordered eating in diabetes: internal consistency and external validity in a contemporary sample of pediatric patients with type 1 diabetes. *Diabetes care* 2010; 33: 495-500
- [85] Lewin AB, LaGreca AM, Geffken GR et al. Validity and reliability of an adolescent and parent rating scale of type 1 diabetes adherence behaviors: the Self-Care Inventory (SCI). *Journal of pediatric psychology* 2009; 34: 999-1007
- [86] Patton SR, Eder S, Schwab J, Sisson CM. Survey of insulin site rotation in youth with type 1 diabetes mellitus. *Journal of pediatric health care: official publication of National Association of Pediatric Nurse Associates & Practitioners* 2010; 24: 365-371
- [87] Patton SR, Clements MA, Fridlington A, Cohoon C, Turpin AL, Delurgio SA. Frequency of mealtime insulin bolus as a proxy measure of adherence for children and youths with type 1 diabetes mellitus. *Diabetes technology & therapeutics* 2013; 15: 124-128

- [88] Cortina S, Repaske DR, Hood KK. Sociodemographic and psychosocial factors associated with continuous subcutaneous insulin infusion in adolescents with type 1 diabetes. *Pediatric diabetes* 2010; 11: 337-344
- [89] Hassan K, Heptulla RA. Glycemic control in pediatric type 1 diabetes: role of caregiver literacy. *Pediatrics* 2010; 125: e1104-1108
- [90] Wiebe DJ, Gelfand D, Butler JM et al. Longitudinal associations of maternal depressive symptoms, maternal involvement, and diabetes management across adolescence. *Journal of pediatric psychology* 2011; 36: 837-846
- [91] Herzer M, Hood KK. Anxiety symptoms in adolescents with type 1 diabetes: association with blood glucose monitoring and glycemic control. *Journal of pediatric psychology* 2010; 35: 415-425
- [92] Ingerski LM, Laffel L, Drotar D, Repaske D, Hood KK. Correlates of glycemic control and quality of life outcomes in adolescents with type 1 diabetes. *Pediatric diabetes* 2010; 11: 563-571
- [93] Wintergerst KA, Hinkle KM, Barnes CN, Omoruyi AO, Foster MB. The impact of health insurance coverage on pediatric diabetes management. *Diabetes research and clinical practice* 2010; 90: 40-44
- [94] Graziano PA, Geffken GR, Williams LB et al. Gender differences in the relationship between parental report of self-regulation skills and adolescents' management of type 1 diabetes. *Pediatric diabetes* 2011; 12: 410-418
- [95] Guilfoyle SM, Crimmins NA, Hood KK. Blood glucose monitoring and glycemic control in adolescents with type 1 diabetes: meter downloads versus self-report. *Pediatric diabetes* 2011; 12: 560-566
- [96] Winsett RP, Stender SR, Gower G, Burghen GA. Adolescent self-efficacy and resilience in participants attending A diabetes camp. *Pediatric nursing* 2010; 36: 293-296
- [97] Savoldelli R YM, Fontan F, Della Manna T, Menezes-Filho HC, Steinmetz L, Damiani D. Vitamin D insufficiency in a Brazilian type 1 diabetes mellitus pediatric population. . *Pediatric diabetes* 2010; 11 [Suppl. 14]: 90-91
- [98] Calliari LE BM, Schechtman HP, Ribeiro EFA et al. Ten year evolution on diagnosis and treatment of type1 diabetes mellitus in an university center in Sao Paulo, Brazil. *Pediatric diabetes* 2009; 10: 58
- [99] Tran F, Vu DC, Nguyen HT et al. Glycaemic control in children with neonatal diabetes and type 1 diabetes in Vietnam. *International health* 2011; 3: 188-192

- [100] Al-Hussaini AA, Alenizi AS, AlZahrani MD, Sulaiman NM, Khan M. Is there an association between type 1 diabetes in children and gallbladder stones formation? Saudi journal of gastroenterology: official journal of the Saudi Gastroenterology Association 2013; 19: 86-88
- [101] Mukama LJ, Moran A, Nyindo M, Philemon R, Msuya L. Improved glycemic control and acute complications among children with type 1 diabetes mellitus in Moshi, Tanzania. Pediatric diabetes 2013; 14: 211-216
- [102] Juvenile Diabetes Research Foundation Continuous Glucose Monitoring Study Group. Effectiveness of continuous glucose monitoring in a clinical care environment: evidence from the Juvenile Diabetes Research Foundation continuous glucose monitoring (JDRF-CGM) trial. Diabetes care 2010; 33: 17-22
- [103] Phillip M, Battelino T, Atlas E et al. Nocturnal glucose control with an artificial pancreas at a diabetes camp. The New England journal of medicine 2013; 368: 824-833
- [104] de Wit M, Winterdijk P, Aanstoot HJ et al. Assessing diabetes-related quality of life of youth with type 1 diabetes in routine clinical care: the MIND Youth Questionnaire (MY-Q). Pediatric diabetes 2012; 13: 638-646
- [105] Adolfsson P, Veijola R, Huot C, Hansen HD, Lademann JB, Phillip M. Safety and patient perception of an insulin pen with simple memory function for children and adolescents with type 1 diabetes--the REMIND study. Current medical research and opinion 2012; 28: 1455-1463
